# Supplementary material for: Macrocyclic Donor–Acceptor Dyads Composed of a Perylene Bisimide Dye Surrounded by Oligothiophene Bridges
Source: PubMed Central journal article supplement (PMC9299635; doi:10.1002/anie.202113598), 2021-11-23
Supplement: ANIE-61-0-s001.pdf [file ANIE-61-0-s001.pdf]

## Supporting Information

### **Macrocyclic Donor–Acceptor Dyads Composed of a Perylene Bisimide Dye Surrounded by Oligothiophene Bridges**

*Kevin Bold, Matthias Stolte, Kazutaka Shoyama, Marco Holzapfel, Alexander Schmiedel, Christoph Lambert, and Frank Würthner\**

anie\_202113598\_sm\_miscellaneous\_information.pdf  
anie\_202113598\_sm\_cif.zip

## Table of Contents

|                                                            |     |
|------------------------------------------------------------|-----|
| Experimental Section .....                                 | S2  |
| Synthetic Procedure .....                                  | S5  |
| <sup>1</sup> H NMR Spectra Comparison .....                | S15 |
| Single Crystal X-ray Analysis .....                        | S16 |
| DFT Calculations.....                                      | S18 |
| Electrochemistry.....                                      | S21 |
| Molecular Orbital DFT Calculations.....                    | S22 |
| Spectroscopy in CH <sub>2</sub> Cl <sub>2</sub> .....      | S22 |
| Spectroscopy in Cyclohexane .....                          | S23 |
| Transient Absorption .....                                 | S23 |
| NMR Spectra.....                                           | S25 |
| Mass Spectra .....                                         | S35 |
| Cartesian Coordinates Received from DFT Calculations ..... | S40 |
| Supporting References.....                                 | S53 |

## Experimental Section

### General Methods

All reactions were performed in standard glass equipment. All used chemicals were purchased from commercial suppliers (*abcr/carbolution chemicals, Acros Organics, Alfa Aesar, Merck, Sigma Aldrich, TCI and VWR*) and applied without further purification. CH<sub>2</sub>Cl<sub>2</sub>, THF and toluene were purified and dried with the commercial purification system PureSolv MD from *Innovative Technology*. Preparative column chromatography was performed with self-packed glass columns of several sizes filled with silica gel 60 M (particle size 0.040-0.063 mm, *Merck*). The solvents CH<sub>2</sub>Cl<sub>2</sub> and methanol were freshly distilled prior to use.

Flash column chromatography was performed on a PuriFLash XS-420 from *Interchim* using columns of the sizes 0012, 0025 and 0040. Silica gel deactivation was achieved by flushing the columns with a solvent mixture of cyclohexane/trimethylamine = 20:1 for two column volumes and subsequent purging with pure cyclohexane for five to ten column volumes prior to the actual purification method.

High-resolution MALDI-TOF mass spectra were measured with a ultrafleXtreme mass spectrometer from *Bruker Daltonics GmbH* using *trans*-2-[3-(4-*tert*-butylphenyl)-2-methyl-2-propenylidene]malononitrile (DCTB) as a matrix material. High-resolution ESI-TOF mass spectroscopy was carried out using a microTOF focus instrument from *Bruker Daltonics GmbH*. For melting point measurements an *Olympus BX41* polarisation microscope with a temperature regulator TP84 from *Linkam Scientific* was used. The reported values are uncorrected. The purification by gel permeation chromatography was performed on a *Shimadzu* instrument (LC-20AD Prominence Pump, SPD-MA20A Prominence Diode Array Detector) with two preparative columns (*Japan Analytical Industries Co., Ltd*). Ethanol stabilized CHCl<sub>3</sub> (Chromasolv®, *Sigma Aldrich*) was used as eluent.

<sup>1</sup>H and <sup>13</sup>C NMR spectra were recorded on *Bruker Avance III HD 400 or 600 MHz* instruments using deuterated solvents. <sup>13</sup>C NMR spectra are broad band proton decoupled. Chemical shifts ( $\delta$ ) are listed in parts per million (ppm). Coupling constants (*J*) are stated in Hertz (Hz). The spectra are referenced internally to residual proton

solvent resonances or natural abundance carbon resonances. Multiplicities are reported as s = singlet, brs = broad singlet, d = doublet, dd = doublet of doublets, t = triplet, dt = doublet of triplets, q = quartet, quin = quintet, sex = sextet, m = multiplet with the chemical shift in the center of the signal.

UV/Vis absorption spectra were recorded for solutions in cuvettes (SUPRASIL®, Hellma® Analytics) on a Jasco V-670 or V-770 spectrometer and fluorescence spectra on a FLS980-D2D2-ST fluorescence spectrometer (*Edinburgh Instruments*) and were corrected against the photomultiplier sensitivity and the lamp intensity.

CV and DPV experiments were carried out with a *BASi* Epsilon potentiostat connected to a microcell apparatus from *rhd instruments* involving a 1.6 mL sample container, a platinum counter- and pseudo-reference electrode as well as a glassy carbon working electrode.

Single crystal X-ray diffraction data were collected at the P11 beamline at DESY. The diffraction data were collected by a single 360° scan  $\phi$  sweep at 100 K. The diffraction data were indexed, integrated, and scaled using the XDS program package.<sup>[S1]</sup> In order to compensate low completeness due to single-axis measurement, two data sets were merged using the XPREP program from *Bruker*.<sup>[S2]</sup> The structures were solved using SHELXT, expanded with Fourier techniques and refined using the SHELX software package.<sup>[S3]</sup> Hydrogen atoms were assigned at idealized positions and were included in the calculation of structure factors. All non-hydrogen atoms in the major disorder part of main residues were refined anisotropically. In the crystal structures some of the side chains were disordered and modelled with restraints and constraints using standard SHELX commands RIGU, DELU, ISOR, SADI, SAME, DFIX, DANG, FLAT, SIMU, CHIV and EADP. The solvent molecules in the solvent accessible voids also had disorder and were restrained and/or constrained by a similar set of instructions.

The transient absorption spectrometer setup is based on a femtosecond laser "Solstice" from *Newport-Spectra Physics* with a fundamental wavelength of 800 nm which provides 100 fs long pulses with a repetition rate of 1 kHz. This laser source was used to pump a NOPA to generate the excitation pulses at 530 nm with a pulse length of around 50 fs. The FWHM-bandwidth of the excitation pulse was 8.5 nm and the pulse energy was set to 20 nJ ((**5T**)<sub>2</sub>-**PBI**) and 15 nJ (**5T-PBI**). Wire grid polarizers

were used to set the pump pulse polarization to  $54.7^\circ$  in relation to the horizontal polarized white light continuum to achieve magic angle conditions. Another part of the laser beam was guided to a TOPAS-C from *Light-Conversion* to obtain a wavelength from 1260 nm (**(5T)<sub>2</sub>-PBI**) and 1000 nm (**5T-PBI**) which was used to generate the probing white light continuum within a moving CaF<sub>2</sub> (**(5T)<sub>2</sub>-PBI**) or sapphire crystal (**5T-PBI**). To achieve the probe range from 450 nm to 915 nm a dielectrically coated quartz glass short pass filter with 950 nm, thickness 3 mm, from *Edmund-Optics* were used. The sample was dissolved in spectroscopic grade dichloromethane from ACROS organics and the solution was filled in a quartz glass cuvette with an optical path length of 0.2 mm (**(5T)<sub>2</sub>-PBI**) and 2 mm (**5T-PBI**). The optical density at the excitation wavelength was set to 0.055 for **(5T)<sub>2</sub>-PBI** and 0.50 for **5T-PBI**. The IRF was ca. 80 fs as measured for stimulated Raman signals of the solvent. Further details on this spectrometer setup are provided in ref<sup>[S4]</sup>.

Spectroelectrochemical experiments were performed on a Cary 5000 UV/Vis/NIR Spectrometer from *Agilent* in combination with a sample compartment consisting of a custom-made cylindrical PTFE cell with a sapphire window and an adjustable three in one electrode (6 mm platinum disc working electrode, 1 mm platinum counter and Ag/AgCl leak free reference electrode) in reflection mode. The optical path was adjusted to 100  $\mu\text{m}$  with a micrometer screw. Potentials were applied with a reference potentiostat PAR 283 from *Princeton Applied Research*. Upon applying a new potential to the solution an equilibration time of 20 seconds between each measurement was employed.

DFT and TD-DFT calculations were performed by Gaussian 16<sup>[S5]</sup> using B3LYP/6-31G(d) level of theory.

Stannylated precursor compound **10**<sup>[S6]</sup> and **Ref-PBI**<sup>[S7]</sup> were synthesized according to literature known procedures. The synthesis of **5T** was recently reported.<sup>[S8]</sup>

## Synthetic Procedure

### 4-Hexyl-2-(thiophen-2-yl)aniline (**2**)

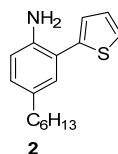

A solution of 2-bromo-4-hexylaniline (3.71 g, 14.5 mmol, 1.00 eq.), 2-thienylboronic acid (5.00 g, 39.1 mmol, 2.70 eq.) and Pd(PPh<sub>3</sub>)<sub>2</sub>Cl<sub>2</sub> (1.52 g, 2.17 mmol, 15 mol%) in degassed dioxane (50 mL) was stirred for 30 min at room temperature. Subsequently, 20 mL of aqueous K<sub>2</sub>CO<sub>3</sub> (1 M) was added and the reaction mixture was refluxed overnight. The suspension was allowed to cool down to room temperature and water (20 mL) was added. The aqueous layer was extracted three times with CH<sub>2</sub>Cl<sub>2</sub> (50 mL each) and the combined organic fractions were washed with brine, dried over MgSO<sub>4</sub> and the solvent was removed under reduced pressure. The crude compound was purified by column chromatography (CH<sub>2</sub>Cl<sub>2</sub>/*n*-hexane = 1:1) to give compound **2**.

**Yield:** 3.56 g, 13.7 mmol, 95%, yellow oil.

**<sup>1</sup>H NMR** (400 MHz, CD<sub>2</sub>Cl<sub>2</sub>): δ/ppm = 7.35 (dd, <sup>3</sup>J = 5.2 Hz, <sup>4</sup>J = 1.2 Hz, 1H), 7.20 (dd, <sup>3</sup>J = 3.5 Hz, <sup>4</sup>J = 1.2 Hz, 1H), 7.12 (q, <sup>3</sup>J = 3.6 Hz, 1H), 7.08 (dd, <sup>4</sup>J = 2.1 Hz, <sup>5</sup>J = 0.4 Hz, 1H), 6.95 (dd, <sup>3</sup>J = 8.1 Hz, <sup>4</sup>J = 2.0 Hz, 1H), 6.69 (d, <sup>3</sup>J = 8.1 Hz, 1H), 3.92 (brs, 2H), 2.50 (t, <sup>3</sup>J = 7.8 Hz, 2H), 1.60-1.51 (m, 2H), 1.38 - 1.26 (m, 6H), 0.88 (t, <sup>3</sup>J = 6.9 Hz, 3H).

**<sup>13</sup>C NMR** (101 MHz, CDCl<sub>3</sub>): δ/ppm = 141.8, 141.5, 133.3, 130.8, 129.1, 127.6, 125.8, 125.2, 120.0, 116.1, 35.1, 31.9, 31.8, 29.1, 22.8, 14.3.

**HRMS** (ESI-TOF, positive mode, MeCN/CHCl<sub>3</sub> 1:1): *m/z* calculated for C<sub>16</sub>H<sub>22</sub>NS [M+H]<sup>+</sup>: 260.1467, found: 260.1465.

**R<sub>f</sub>:** 0.63 using CH<sub>2</sub>Cl<sub>2</sub>/*n*-hexane = 1:1 as eluent.

### 4-Hexyl-2,6-di(thiophen-2-yl)aniline (**3**)

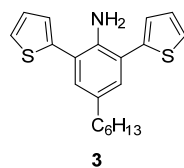

A solution of 4-hexylaniline (2.47 g, 7.38 mmol, 1.00 eq.), 2-thienyl boronic acid (2.83 g, 22.1 mmol, 3.00 eq.) and Pd(PPh<sub>3</sub>)<sub>2</sub>Cl<sub>2</sub> (777 mg, 1.11 mmol, 15 mol%) in degassed dioxane (40 mL) was stirred for 30 min at room temperature. Subsequently, 20 mL of aqueous K<sub>2</sub>CO<sub>3</sub> (1 M) was added and the reaction mixture was heated to reflux for three days. The suspension was allowed to cool down to room temperature and water (20 mL) was added. The aqueous layer was extracted three times with CH<sub>2</sub>Cl<sub>2</sub> (50 mL each) and the combined organic fractions were washed with brine, dried over MgSO<sub>4</sub> and the solvent was removed under reduced pressure. The crude product was purified by column chromatography (gradient of *n*-hexane/CH<sub>2</sub>Cl<sub>2</sub> = 4:1 to 3:1) to give the title compound **3**.

**Yield:** 1.93 g, 5.67 mmol, 77%, brown oil.

**<sup>1</sup>H NMR** (400 MHz, CD<sub>2</sub>Cl<sub>2</sub>): δ/ppm = 7.38 (dd, <sup>3</sup>J = 5.2 Hz, <sup>4</sup>J = 1.2 Hz, 2H), 7.24 (dd, <sup>3</sup>J = 3.5 Hz, <sup>4</sup>J = 1.2 Hz, 2H), 7.14 (dd, <sup>3</sup>J = 5.2 Hz, <sup>4</sup>J = 3.5 Hz, 2H), 7.08 (s, 2H), 4.28 (brs, 2H), 2.52 (t, <sup>3</sup>J = 7.6 Hz, 2H), 1.69 (quin, <sup>3</sup>J = 7.3 Hz, 2H), 1.40 - 1.25 (m, 6H), 0.88 (t, <sup>3</sup>J = 6.9 Hz, 3H).

**<sup>13</sup>C NMR** (101 MHz, CDCl<sub>3</sub>): δ/ppm = 141.3, 140.0, 132.5, 131.0, 127.7, 126.3, 125.5, 120.6, 35.0, 31.9, 31.8, 29.2, 22.8, 14.3.

**HRMS** (ESI-TOF, positive mode, MeCN/CHCl<sub>3</sub> 1:1): *m/z* calculated for C<sub>20</sub>H<sub>24</sub>NS<sub>2</sub> [M+H]<sup>+</sup>: 342.1345, found: 342.1348.

**R<sub>f</sub>:** 0.46 using CH<sub>2</sub>Cl<sub>2</sub>/*n*-hexane = 1:1 as eluent.

***N,N'*-Di(4-hexyl-2-(thiophen-2-yl)phenyl)-3,4:9,10-tetracarboxylic acid bisimide  
(4)**

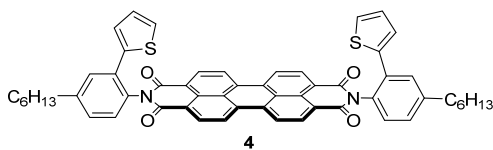

A suspension of perylene-3,4:9,10-tetracarboxylic dianhydride (300 mg, 765  $\mu\text{mol}$ , 1.00 eq.), aniline derivate **2** (794 mg, 3.06 mmol, 4.00 eq.) and  $\text{Zn}(\text{OAc})_2$  (42.0 g, 229  $\mu\text{mol}$ , 0.30 eq) in imidazole (3.0 g, 44.1 mmol) was stirred for 4 h at 120 °C under microwave irradiation. The crude solid was collected with  $\text{CH}_2\text{Cl}_2$ , adsorbed on celite and the solvent was removed under reduced pressure. The crude product-celite mixture was purified by flash column chromatography (gradient of  $\text{CH}_2\text{Cl}_2/n$ -hexane = 0:1 to 1:0) to give compound **4**.

**Yield:** 492 mg, 562  $\mu\text{mol}$ , 74%, red solid.

**$^1\text{H NMR}$**  (400 MHz,  $\text{CD}_2\text{Cl}_2$ ):  $\delta/\text{ppm}$  = 8.73 (d,  $^3J = 8.0$  Hz, 4H), 8.69 (d,  $^3J = 8.0$  Hz, 4H), 7.60 (d,  $^4J = 2.0$  Hz, 2H), 7.38 (dd,  $^3J = 8.0$  Hz,  $^4J = 2.1$  Hz, 2H), 7.26 (d,  $^3J = 7.9$  Hz, 2H), 7.15 (dd,  $^3J = 3.6$  Hz,  $^4J = 1.2$  Hz, 2H), 7.12 (dd,  $^3J = 5.1$  Hz,  $^4J = 1.2$  Hz, 2H), 6.90 (q,  $^3J = 3.6$  Hz, 2H), 2.77 (t,  $^3J = 7.6$  Hz, 4H), 1.76 (quin,  $^3J = 7.5$  Hz, 4H), 1.41 - 1.34 (m, 12H), 0.93 (t,  $^3J = 7.0$  Hz, 6H).

**$^{13}\text{C NMR}$**  (101 MHz,  $\text{CDCl}_3$ ):  $\delta/\text{ppm}$  = 163.9, 144.6, 139.7, 135.1, 133.2, 132.1, 131.0, 130.2, 129.6, 129.3, 127.3, 126.1, 126.0, 123.5, 123.4, 35.9, 31.9, 31.3, 29.3, 22.8, 14.3.

**HRMS** (ESI-TOF, positive mode,  $\text{MeCN}/\text{CHCl}_3$  1:1):  $m/z$  calculated for  $\text{C}_{56}\text{H}_{46}\text{N}_2\text{NaO}_4\text{S}_2$  [ $\text{M}+\text{Na}$ ] $^+$ : 897.2791, found: 897.2736.

**M.p.:** >300 °C.

**R<sub>f</sub>:** 0.32 using  $\text{CH}_2\text{Cl}_2$  as eluent.



***N,N'*-Tetra(4-hexyl-2-(thiophen-2-yl)phenyl)-3,4:9,10-tetracarboxylic acid bisimide (5)**

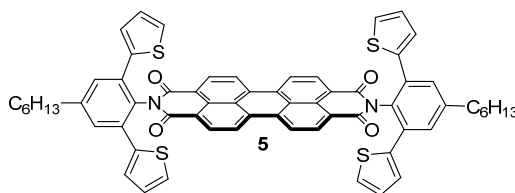

A suspension of perylene-3,4:9,10-tetracarboxylic dianhydride (50.0 mg, 127  $\mu\text{mol}$ , 1.00 eq.), aniline derivate **3** (348 mg, 1.02 mmol, 8.00 eq.) and  $\text{Zn}(\text{OAc})_2 \cdot 2\text{H}_2\text{O}$  (42.0 mg, 229  $\mu\text{mol}$ , 1.30 eq) in imidazole (600 mg, 8.81 mmol) was stirred for 14 h at 135  $^\circ\text{C}$  under microwave irradiation. The crude solid was collected with  $\text{CH}_2\text{Cl}_2$ , ultrasonicated, adsorbed on celite and the solvent was removed under reduced pressure. The crude product-celite mixture was purified by flash column chromatography (gradient of  $\text{CH}_2\text{Cl}_2/n$ -hexane = 1:1,  $\text{CH}_2\text{Cl}_2$ ) to give compound **5**.

**Yield:** 14.6 mg, 14.1  $\mu\text{mol}$ , 11%, red solid.

**$^1\text{H}$  NMR** (400 MHz,  $\text{CD}_2\text{Cl}_2$ ):  $\delta/\text{ppm}$  = 8.57 (d,  $^3J = 8.1$  Hz, 4H), 8.69 (d,  $^3J = 8.1$  Hz, 4H), 7.55 (s, 4H), 7.13 (dd,  $^3J = 3.6$  Hz,  $^4J = 1.1$  Hz, 8H), 6.89 (dd,  $^3J = 3.6$  Hz, 4H), 2.80 (t,  $^3J = 7.8$  Hz, 4H), 1.80 (quin,  $^3J = 7.1$  Hz, 4H), 1.50 - 1.35 (m, 12H), 0.93 (t,  $^3J = 7.0$  Hz, 6H).

**$^{13}\text{C}$  NMR** (101 MHz,  $\text{CD}_2\text{Cl}_2$ ):  $\delta/\text{ppm}$  = 164.0, 144.9, 139.8, 135.0, 134.6, 132.0, 131.4, 130.0, 129.0, 127.5, 127.0, 126.8, 126.5, 123.5, 123.2, 36.0, 32.1, 31.6, 29.6, 23.0, 14.3.

**HRMS** (MALDI-TOF, positive mode, DCTB in  $\text{CHCl}_3$ ):  $m/z$  calculated for  $\text{C}_{64}\text{H}_{50}\text{N}_2\text{O}_4\text{S}_4$   $[\text{M}]^+$ : 1038.2653, found: 1038.2648.

**M.p.:** >300  $^\circ\text{C}$ .

**R<sub>f</sub>:** 0.40 using  $\text{CH}_2\text{Cl}_2$  as eluent.

***N,N'*-Di(4-hexyl-2-(5-(tributylstannyl)thiophen-2-yl)phenyl)-3,4:9,10-tetracarboxylic acid bisimide (6)**

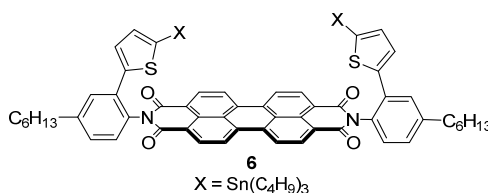

To a solution of perylene bisimide **4** (480 mg, 549  $\mu$ mol, 1.00 eq.) in dry THF (100 mL) *n*-butyllithium (5.14 mL, 1.6 M in *n*-hexane, 15.0 eq.) was added dropwise under stirring at room temperature and the solution was further stirred for 2 h. Subsequently, Sn(C<sub>4</sub>H<sub>9</sub>)<sub>3</sub>Cl (2.53 mL, 9.32 mmol, 17.0 eq.) was added dropwise at room temperature and the solution was further stirred overnight. The reaction was quenched with water (50 mL), extracted three times with CH<sub>2</sub>Cl<sub>2</sub> (50 mL each), and the combined organic layers were washed with brine, dried over MgSO<sub>4</sub> and the solvent was removed under reduced pressure. The crude residue was purified *via* flash column chromatography (deactivated silica gel, gradient of CH<sub>2</sub>Cl<sub>2</sub>/*n*-hexane = 0:1 to 1:0) to give the desired compound **6**.

**Yield:** 355 mg, 244  $\mu$ mol, 45%, deep red solid.

**<sup>1</sup>H NMR** (400 MHz, CD<sub>2</sub>Cl<sub>2</sub>):  $\delta$ /ppm = 8.73 (d, <sup>3</sup>*J* = 8.0 Hz, 4H), 8.69 (d, <sup>3</sup>*J* = 8.0 Hz, 4H), 7.52 (d, <sup>4</sup>*J* = 2.0 Hz, 2H), 7.38 (dd, <sup>3</sup>*J* = 8.0 Hz, <sup>4</sup>*J* = 2.1 Hz, 2H), 7.32 (d, <sup>3</sup>*J* = 3.5 Hz, 2H), 7.27 (d, <sup>3</sup>*J* = 8.0 Hz, 2H), 6.98 (d, <sup>3</sup>*J* = 3.5 Hz, 2H), 2.77 (t, <sup>3</sup>*J* = 7.8 Hz, 4H), 1.77 (quin, <sup>3</sup>*J* = 7.8 Hz, 4H), 1.42 - 1.35 (m, 12H), 1.27 - 1.21 (m, 12H), 1.04 (sex, <sup>3</sup>*J* = 7.4 Hz, 12H), 0.93 (t, <sup>3</sup>*J* = 7.0 Hz, 6H), 0.80 (t, <sup>3</sup>*J* = 8.1 Hz, 12H), 0.64 (t, <sup>3</sup>*J* = 7.4 Hz, 18H).

**<sup>13</sup>C NMR** (101 MHz, CDCl<sub>3</sub>):  $\delta$ /ppm = 164.0, 145.3, 144.9, 138.4, 135.8, 135.1, 133.5, 131.8, 130.3 (2 signals), 130.0, 128.9, 127.4, 126.8, 123.8, 123.7, 36.1, 32.2, 31.7, 29.6, 29.0, 27.4, 23.1, 14.3, 13.6, 10.9.

**HRMS** (ESI-TOF, positive mode, MeCN/CHCl<sub>3</sub> 1:1): *m/z* calculated C<sub>80</sub>H<sub>98</sub>N<sub>2</sub>NaO<sub>4</sub>S<sub>2</sub>Sn<sub>2</sub> [M+Na]<sup>+</sup>: 1477.4904, found: 1477.4821.

**M.p.:** 116-118 °C.

**R<sub>f</sub>:** 0.55 using CH<sub>2</sub>Cl<sub>2</sub> as eluent.

***N,N'*-Tetra(4-hexyl-2-(5-(tributylstannyl)thiophen-2-yl)phenyl)-3,4:9,10-tetracarboxylic acid bisimide (7)**

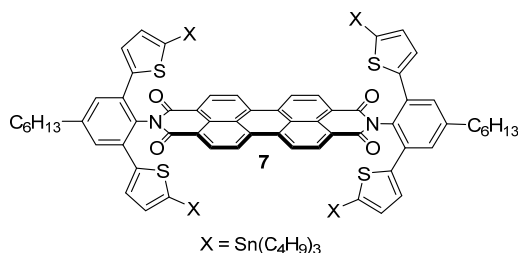

To a solution of perylene bisimide **5** (108 mg, 104  $\mu$ mol, 1.00 eq.) in dry THF (22 mL) *n*-butyllithium (1.30 mL, 1.6 M in *n*-hexane, 20.0 eq.) was added dropwise under stirring at room temperature and the solution was further stirred for 1 h. Subsequently, Sn(C<sub>4</sub>H<sub>9</sub>)<sub>3</sub>Cl (676  $\mu$ L, 2.49 mmol, 24.0 eq.) was added dropwise at room temperature and the solution was further stirred overnight. The reaction was quenched with water (15 mL), extracted three times with CH<sub>2</sub>Cl<sub>2</sub> (50 mL each), and the combined organic layers were washed with brine, dried over MgSO<sub>4</sub> and the solvent was removed under reduced pressure. The crude residue was purified *via* flash column chromatography (deactivated silica gel, gradient of *n*-hexane/ CH<sub>2</sub>Cl<sub>2</sub> = 1:0 to 1:1) to yield the desired compound **7**.

**Yield:** 45.1 mg, 20.5  $\mu$ mol, 20%, deep red solid.

**<sup>1</sup>H NMR** (400 MHz, CD<sub>2</sub>Cl<sub>2</sub>):  $\delta$ /ppm = 8.65 (d, <sup>3</sup>*J* = 7.9 Hz, 4H), 8.62 (d, <sup>3</sup>*J* = 7.9 Hz, 4H), 7.55 (s, 4H), 7.27 (d, <sup>3</sup>*J* = 3.4 Hz, 4H), 6.94 (d, <sup>3</sup>*J* = 3.4 Hz, 4H), 2.79 (t, <sup>3</sup>*J* = 7.7 Hz, 4H), 1.79 (quin, <sup>3</sup>*J* = 7.2 Hz, 4H), 1.52-1.46 (m, 4H), 1.41-1.36 (m, 8H), 1.32 - 1.24 (m, 24H), 1.06 (sex, <sup>3</sup>*J* = 7.4 Hz, 24H), 0.93 (t, <sup>3</sup>*J* = 7.0 Hz, 6H), 0.82 (t, <sup>3</sup>*J* = 8.1 Hz, 24H), 0.67 (t, <sup>3</sup>*J* = 7.2 Hz, 36H).

**<sup>13</sup>C NMR** (150 MHz, CD<sub>2</sub>Cl<sub>2</sub>):  $\delta$ /ppm = 164.2, 145.3, 144.8, 138.5, 135.7, 135.3, 134.8, 132.1, 130.2, 130.1, 128.1, 127.9, 127.0, 123.8, 123.6, 36.1, 32.2, 31.6, 29.7, 29.0, 27.4, 23.0, 14.3, 13.7, 11.0.

**HRMS** (MALDI-TOF, positive mode, DCTB in CHCl<sub>3</sub>): *m/z* calculated C<sub>112</sub>H<sub>154</sub>N<sub>2</sub>NaO<sub>4</sub>S<sub>4</sub>Sn<sub>4</sub> [M+Na]<sup>+</sup>: 2221.6772, found: 2221.6771.

**M.p.:** 183-185 °C.

**R<sub>f</sub>:** 0.73 using CH<sub>2</sub>Cl<sub>2</sub>/cyclohexane = 2:1 as eluent.

***N,N'*-Di(4-hexyl-2-(5-(chloro(1,5-cyclooctadiene)platinum)thiophen-2-yl)phenyl)-3,4:9,10-tetracarboxylic acid bisimide (8)**

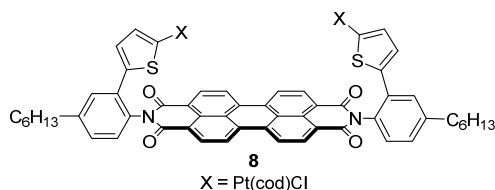

A solution of **6** (50.0 mg, 34.4  $\mu\text{mol}$ , 1.0 eq.) and Pt(COD)Cl<sub>2</sub> (28.3 mg, 75.5  $\mu\text{mol}$ , 2.2 eq.) in degassed toluene (10 mL) was stirred for 2 h at 95 °C. The solvent was removed under reduced pressure and the crude product was purified *via* flash column chromatography (gradient of CH<sub>2</sub>Cl<sub>2</sub>/acetone = 1:0 to 20:1) to yield compound **8**.

**Yield:** 31.0 mg, 20.0  $\mu\text{mol}$ , 58%, deep red solid.

**<sup>1</sup>H NMR** (400 MHz, C<sub>2</sub>D<sub>2</sub>Cl<sub>4</sub>):  $\delta$ /ppm = 8.70 (brs, 8H), 7.59 (d, <sup>3</sup>J = 1.9 Hz, 2H), 7.32 (dd, <sup>3</sup>J = 1.9 Hz, <sup>3</sup>J = 8.0 Hz, 2H), 7.24 (<sup>3</sup>J = 8.0 Hz), 7.08 (d, <sup>3</sup>J = 3.7 Hz, 2H), 6.77 (d, <sup>3</sup>J = 3.7 Hz, 2H), 5.60-5.52 (m, 4H), 4.96-4.89 (m, 4H), 2.75 (t, <sup>3</sup>J = 7.7 Hz, 4H), 2.47-2.12 (m, 16H), 1.74 (quin, <sup>3</sup>J = 7.3 Hz, 4H), 1.38-1.26 (m, 12H), 0.93 (t, <sup>3</sup>J = 7.0 Hz, 6H).

**<sup>13</sup>C NMR** (101 MHz, C<sub>2</sub>D<sub>2</sub>Cl<sub>4</sub>):  $\delta$ /ppm = 163.6, 144.3, 141.1, 138.5, 134.7, 133.3, 131.9, 130.3, 129.7, 129.4, 129.2, 128.1, 126.3, 126.0, 123.2, 120.2, 112.9, 90.1, 35.7, 31.6, 31.5, 31.2, 30.8, 29.1, 28.3, 22.6, 14.2.

**HRMS** (MALDI-TOF, positive mode, DCTB in CHCl<sub>3</sub>): *m/z* calculated for C<sub>72</sub>H<sub>68</sub>Cl<sub>2</sub>N<sub>2</sub>O<sub>4</sub>Pt<sub>2</sub>S<sub>4</sub> [M]<sup>+</sup>: 1548.3293, found: 1548.3288.

**M.p.:** >300 °C.

**R<sub>f</sub>:** 0.29 using CH<sub>2</sub>Cl<sub>2</sub>/acetone = 20:1 as eluent.

***N,N'*-Tetra(4-hexyl-2-(5-(chloro(1,5-cyclooctadiene)platinum)thiophen-2-yl)phenyl)-3,4:9,10-tetracarboxylic acid bisimide (9)**

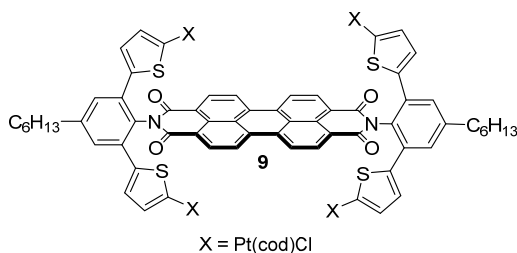

A solution of **7** (49.6 mg, 22.6  $\mu\text{mol}$ , 1.0 eq.) and Pt(cod)Cl<sub>2</sub> (169 mg, 452  $\mu\text{mol}$ , 20.0 eq.) in degassed toluene (25 mL) was stirred overnight at 80 °C. The solvent was removed under reduced pressure and the crude product was purified *via* flash column chromatography (gradient of CH<sub>2</sub>Cl<sub>2</sub>/MeOH = 1:0 to 99:1) to yield compound **9**.

**Yield:** 44.4 mg, 217  $\mu\text{mol}$ , 82%, deep red solid.

**<sup>1</sup>H NMR** (400 MHz, C<sub>2</sub>D<sub>2</sub>Cl<sub>4</sub>):  $\delta$ /ppm = 8.66 (brs, 8H), 7.48 (brs, 4H), 7.10 (brs, 4H), 6.77 (brs, 4H), 5.55 (brs, 8H), 4.85 (brs, 8H), 2.77-2.70 (m, 4H), 2.44-2.36 (m, 8H), 2.32-2.24 (m, 4H), 2.15-2.10 (m, 4H), 1.78-1.71 (m, 4H), 1.39-1.34 (m, 12H), 0.96-0.91 (m, 6H) .

**<sup>13</sup>C NMR** (150 MHz, C<sub>2</sub>D<sub>2</sub>Cl<sub>4</sub>):  $\delta$ /ppm = 163.7, 141.2, 138.4, 134.5, 134.2, 132.1, 130.2, 126.5, 123.4, 120.2, 116.7, 116.5, 116.3, 112.9, 100.3, 99.4, 90.0, 35.7, 31.5, 30.8, 29.6, 29.2, 28.3, 22.6, 14.2.

**HRMS** (MALDI-TOF, positive mode, DCTB in CHCl<sub>3</sub>): *m/z* calculated C<sub>96</sub>H<sub>94</sub>Cl<sub>4</sub>N<sub>2</sub>O<sub>4</sub>Pt<sub>4</sub>S<sub>4</sub> [M]<sup>+</sup>: 2386.3441, found: 2386.3437.

**M.p.:** >300 °C.

**R<sub>f</sub>:** 0.44 using CH<sub>2</sub>Cl<sub>2</sub>/MeOH = 20:1 as eluent.

## 5T-PBI

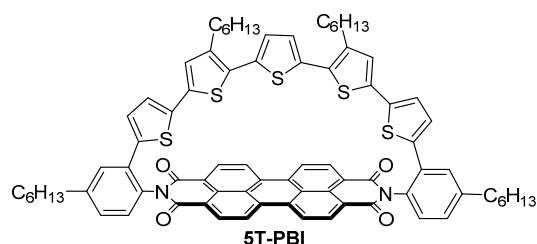

To a stirred solution of **8** (31.0 mg, 20.0  $\mu\text{mol}$ , 1.00 eq.) in degassed toluene (40 mL) was added dropwise the stannylated oligothiophene **10** (21.9 mg, 37.8  $\mu\text{mol}$ , 1.10 eq.) in degassed toluene (1.0 mL) *via* a syringe pump over 15 h and the reaction mixture was stirred overnight at 75 °C. The solvent was removed *in vacuo* and the crude residue was washed with *n*-hexane. The crude product was redissolved in degassed  $\text{CH}_2\text{Cl}_2$  (40 mL) and 1,1'-bis(diphenylphosphino)ferrocene (24.4 mg, 75.5  $\mu\text{mol}$ , 2.20 eq.) was added. The solution was stirred for 6 h at room temperature. The solvent was removed *in vacuo* and the residue was dissolved in degassed *m*-xylene (40 mL) and stirred overnight at 120 °C. The solvent was removed under reduced pressure and the crude product was purified *via* flash column chromatography ( $\text{CH}_2\text{Cl}_2/\text{cyclohexane} = 1:1$  to 1:0) and gel permeation chromatography ( $\text{CHCl}_3$ ) to give the desired compound.

**Yield:** 7.71 mg, 5.99  $\mu\text{mol}$ , 30%, red orange solid.

**$^1\text{H NMR}$**  (600 MHz,  $\text{CD}_2\text{Cl}_2$ ):  $\delta/\text{ppm} = 8.70$  (s, 8H), 7.79 (d,  $^4J = 1.8$  Hz, 2H), 7.45 (d,  $^3J = 4.0$  Hz, 2H), 7.36 (dd,  $^3J = 8.0$  Hz,  $^4J = 1.8$  Hz, 2H), 7.30 (d,  $^3J = 8.0$  Hz, 2H), 7.19 (d,  $^3J = 4.0$  Hz, 2H), 7.03 (s, 2H), 6.88 (s, 2H), 2.80 (t,  $^3J = 7.7$  Hz, 4H), 2.58 (t,  $^3J = 7.9$  Hz, 4H), 1.79 (quin,  $^3J = 7.6$  Hz, 4H), 1.35-1.42 (m, 8H), 1.22-1.31 (m, 20H), 0.94 (t,  $^3J = 7.0$  Hz, 6H), 0.83 (t,  $^3J = 7.0$  Hz, 6H).

**$^{13}\text{C NMR}$**  (150 MHz,  $\text{CD}_2\text{Cl}_2$ ):  $\delta/\text{ppm} = 164.2, 145.0, 141.5, 138.1, 137.8, 135.7, 135.5, 135.1, 132.2, 132.0, 130.7, 130.1, 129.5, 129.3, 129.2, 128.6, 127.7, 127.0, 126.9, 126.8, 124.1, 123.8, 123.6, 36.2, 32.2, 32.0, 31.7, 30.7, 29.6, 29.5, 23.1, 22.9, 14.3, 14.2$ .

**HRMS** (MALDI-TOF, positive mode, DCTB in  $\text{CHCl}_3$ ):  $m/z$  calculated  $\text{C}_{80}\text{H}_{74}\text{N}_2\text{O}_4\text{S}_5$   $[\text{M}]^+$ : 1286.4252, found: 1286.4247.

**UV/Vis**  $\lambda_{\text{max}}$  ( $\epsilon_{\text{max}}$ ):  $\text{CH}_2\text{Cl}_2$ : 531 nm ( $64.8 \times 10^3 \text{ L mol}^{-1} \text{ cm}^{-1}$ ).

**Fluorescence**  $\lambda_{\text{max}}$  ( $\lambda_{\text{ex}}$ ): Cyclohexane: 528 nm (480 nm).  $\Phi_{\text{fl}} = <0.1\%$ .

**R<sub>f</sub>**: 0.32 using  $\text{CH}_2\text{Cl}_2$  as eluent.

## (5T)<sub>2</sub>-PBI

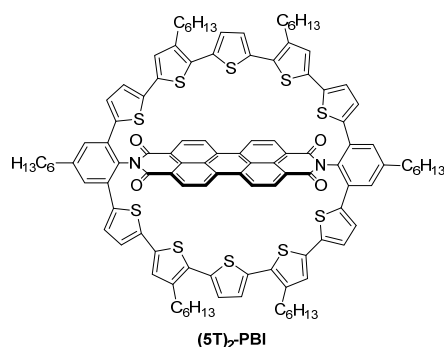

To a stirred solution of **9** (44.4 mg, 18.5  $\mu\text{mol}$ , 1.00 eq.) in degassed toluene (25 mL) was added dropwise the stannylated oligothiophene **10** (40.7 mg, 40.9  $\mu\text{mol}$ , 2.20 eq.) in degassed toluene (1.0 mL) *via* a syringe pump over 15 h and the reaction mixture was stirred overnight at 75 °C. The solvent was removed *in vacuo* and the crude residue was washed with *n*-hexane. The crude product was redissolved in degassed  $\text{CH}_2\text{Cl}_2$  (25 mL) and 1,1'-bis(diphenylphosphino)ferrocene (45.3 mg, 81.7  $\mu\text{mol}$ , 4.40 eq.) was added. The solution was stirred for 6 h at room temperature. The solvent was removed *in vacuo* and the residue was dissolved in degassed *m*-xylene (25 mL) and stirred overnight at 120 °C. The solvent was removed under reduced pressure and the crude product was purified *via* flash column chromatography (cyclohexane /  $\text{CH}_2\text{Cl}_2$  = 1:0 to 1:1) and gel permeation chromatography ( $\text{CHCl}_3$ ) to give the desired compound.

**Yield:** 1.26 mg, 676 nmol, 4%, red orange solid.

**<sup>1</sup>H NMR** (400 MHz,  $\text{CD}_2\text{Cl}_2$ ):  $\delta$ /ppm = 8.84 (d,  $^3J$  = 8.4 Hz, 4H), 8.74 (d,  $^3J$  = 7.9 Hz, 4H), 7.73 (s, 4H), 7.43 (d,  $^3J$  = 3.9 Hz, 4H), 7.20 (d,  $^3J$  = 3.9 Hz, 4H), 7.04 (s, 4H), 6.90 (s, 4H), 2.85 (t,  $^3J$  = 7.8 Hz, 4H), 2.60 (t,  $^3J$  = 7.6 Hz, 8H), 1.84 (quin,  $^3J$  = 7.3 Hz, 4H), 1.50-1.27 (m, 44H), 0.95 (t,  $^3J$  = 7.1 Hz, 6H), 0.88 (t,  $^3J$  = 6.7 Hz, 12H).

**<sup>13</sup>C NMR** (150 MHz,  $\text{CD}_2\text{Cl}_2$ ):  $\delta$ /ppm = 164.6, 145.1, 141.3, 138.3, 138.1, 135.9, 135.7, 134.9, 134.0, 132.3, 130.3, 129.7, 129.2, 128.9, 127.2, 127.1, 126.5, 125.8, 124.5, 123.8, 123.7, 36.2, 32.2, 32.0, 31.6, 30.7, 30.1, 29.7, 29.5, 23.1, 23.0, 14.3, 14.2.

**HRMS** (MALDI-TOF, positive mode, DCTB in  $\text{CHCl}_3$ ): *m/z* calculated for  $\text{C}_{112}\text{H}_{106}\text{N}_2\text{O}_4\text{S}_{10}$   $[\text{M}+\text{H}]^+$ : 1862.5360, found: 1862.5354.

**UV/Vis**  $\lambda_{\text{max}}$  ( $\epsilon_{\text{max}}$ ):  $\text{CH}_2\text{Cl}_2$ : 380 nm ( $93.9 \times 10^3 \text{ L mol}^{-1} \text{ cm}^{-1}$ ).

**Fluorescence**  $\lambda_{\text{max}}$  ( $\lambda_{\text{ex}}$ ): Cyclohexane: 528 nm (480 nm).  $\Phi_{\text{fl}}$  = <0.1%

**R<sub>f</sub>**: 0.81 using  $\text{CH}_2\text{Cl}_2$ /cyclohexane = 2:1 as eluent.

# <sup>1</sup>H NMR Spectra Comparison

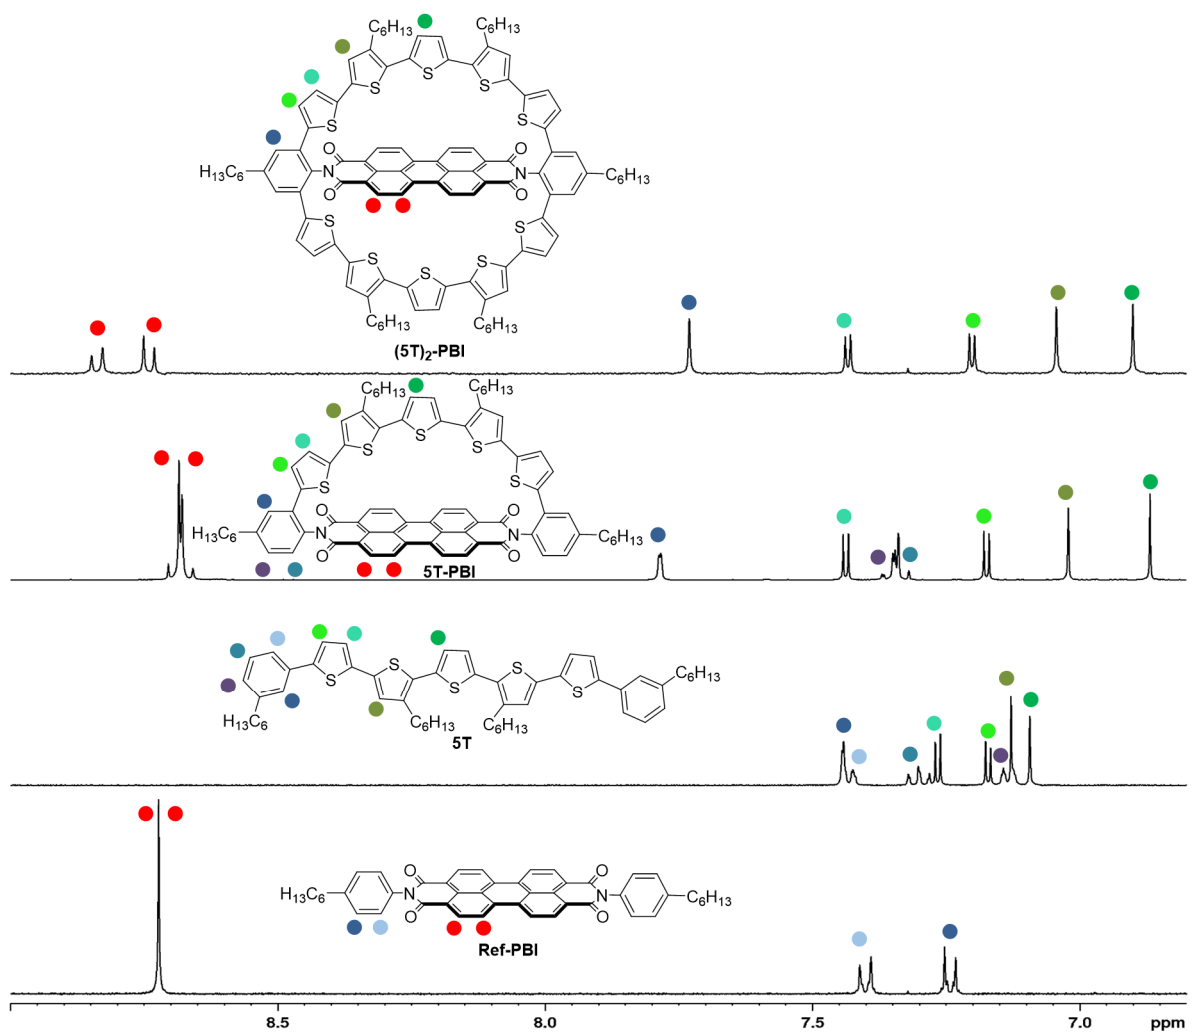

**Figure S1.** Aromatic region of the <sup>1</sup>H NMR spectra (400 MHz) of Ref-PBI, 5T, 5T-PBI and (5T)<sub>2</sub>-PBI (from bottom to top) in CD<sub>2</sub>Cl<sub>2</sub> at 298 K.



## Single Crystal X-ray Analysis

**Table S1.** Crystal data and structure refinement for **(5T)<sub>2</sub>-PBI**

|                                      |                                                           |                             |
|--------------------------------------|-----------------------------------------------------------|-----------------------------|
| CCDC Number                          | 2102595                                                   |                             |
| Empirical formula                    | $C_{120.64}H_{113.21}Cl_{1.44}N_2O_4S_{10}$               |                             |
| Formula weight                       | 2026.55                                                   |                             |
| Temperature                          | 100(2) K                                                  |                             |
| Wavelength                           | 0.61992 Å                                                 |                             |
| Crystal system                       | Triclinic                                                 |                             |
| Space group                          | P-1                                                       |                             |
| Unit cell dimensions                 | $a = 15.385(10)$ Å                                        | $\alpha = 74.973(5)^\circ$  |
|                                      | $b = 17.342(3)$ Å                                         | $\beta = 89.82(2)^\circ$    |
|                                      | $c = 31.216(5)$ Å                                         | $\gamma = 85.158(16)^\circ$ |
| Volume                               | 8014(5) Å <sup>3</sup>                                    |                             |
| Z                                    | 3                                                         |                             |
| Density (calculated)                 | 1.260 mg/m <sup>3</sup>                                   |                             |
| Absorption coefficient               | 0.203 mm <sup>-1</sup>                                    |                             |
| F(000)                               | 3202.4                                                    |                             |
| Crystal size                         | 0.100 x 0.100 x 0.100 mm <sup>3</sup>                     |                             |
| Theta range for data collection      | 0.589 to 27.653°.                                         |                             |
| Index ranges                         | $22 \leq h \leq 22, 25 \leq k \leq 24, 45 \leq l \leq 46$ |                             |
| Reflections collected                | 264918                                                    |                             |
| Independent reflections              | 43791 [ $R_{int} = 0.0914$ ]                              |                             |
| Completeness to theta = 21.836°      | 98.8%                                                     |                             |
| Absorption correction                | None                                                      |                             |
| Refinement method                    | Full-matrix least-squares on $F^2$                        |                             |
| Data / restraints / parameters       | 43791 / 4155 / 2852                                       |                             |
| Goodness-of-fit on $F^2$             | 1.109                                                     |                             |
| Final R indices [ $I > 2\sigma(I)$ ] | $R_1 = 0.0848, wR_2 = 0.2698$                             |                             |
| R indices (all data)                 | $R_1 = 0.1117, wR_2 = 0.3036$                             |                             |
| Extinction coefficient               | n/a                                                       |                             |
| Largest diff. peak and hole          | 0.624 and -0.664 e·Å <sup>-3</sup>                        |                             |

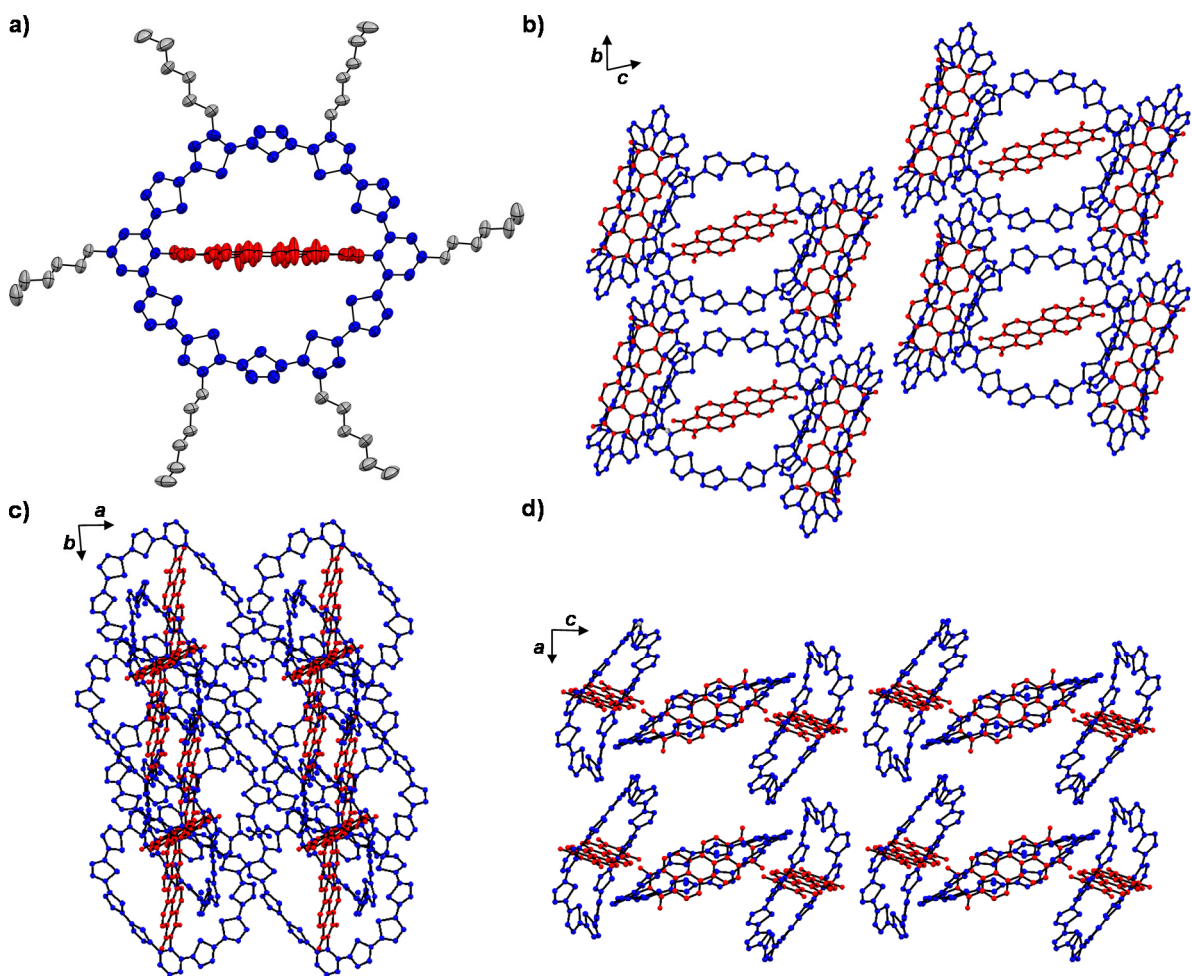

**Figure S2.** a) Front view of a single (5T)<sub>2</sub>-PBI centrosymmetric molecule A (ORTEP drawing in 50% probability for thermal ellipsoids). PBI chromophore is coloured in red, macrocycle in blue and solubilizing alkyl chains in grey. Crystal packing seen approximately along the *a*-, *c*-, and *b*-axes for b), c) and d), respectively. Heavily disordered aliphatic chains as well as solvent molecules were omitted for clarity.

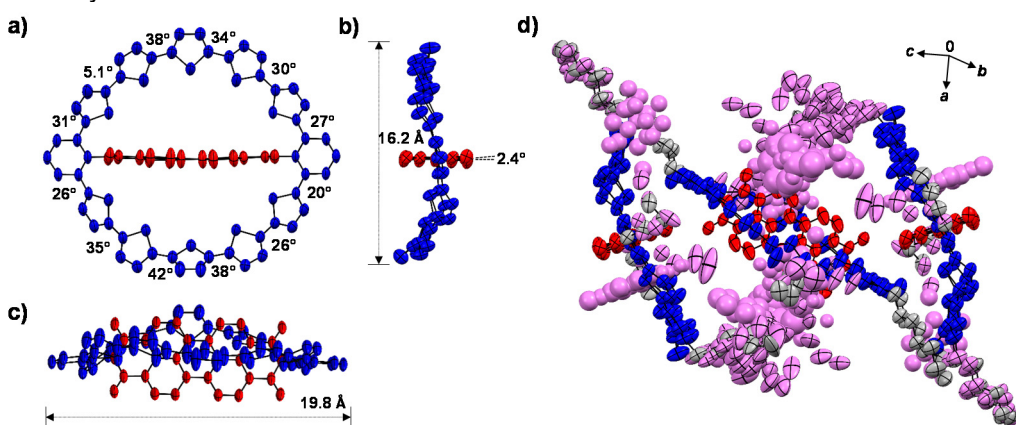

**Figure S3.** a) Front, b) side and c) top view onto the unsymmetric molecule B of (5T)<sub>2</sub>-PBI. Heavily disordered aliphatic chains as well as solvent molecules were omitted for clarity. d) Unit cell including all structural disorder (violet) and aliphatic chains (grey). The ellipsoids are set to 50% probability.

## DFT Calculations

### Rotational Barrier:

To estimate the rotational barrier (Figure S4) of the imide substituent of **8**, calculations were conducted only on one half-segment, namely the naphthalene imide part (Figure S4b). In order to estimate the energy cost of this rotation a dihedral angle scan of  $\alpha$  in  $0.5^\circ$  intervals was performed (Figure S4a). Here, the change of the total energies  $\Delta E$  depending on the torsion angle  $\alpha$  is plotted. This angle  $\alpha$ , which was modified during the scan, is highlighted in Figure S4c. The initial  $\alpha$  of  $90^\circ$  between the phenyl substituent and the naphthalene monoimide core was readily reduced until complete rotation of the substituent. In the starting geometry (Figure S4c) the sulphur atom points away from the naphthalene imide core, whereas during the rotation this subunit undergoes a conformational change at  $\alpha = 59^\circ$  (Figure S4d) towards the core due to the repulsive hydrogen-core interaction. Further rotation up to  $-26^\circ$  leads to an outer plane uplifting of the nitrogen atom (Figure S4e) and an almost perpendicular angle between the thiophene and the phenyl group. This geometry also resembles the structure with the highest total energy level during the entire rotation process and therefore the closest structure to the “real” transition state (TS). This geometry was the basis for the TS calculation of which the result is shown in Figure S4f. The energy difference between this TS geometry and the fully relaxed monoimide is  $114 \text{ kJ mol}^{-1}$  and can therefore be considered as the rotational barrier or the Gibbs free energy of activation  $\Delta G^\ddagger$ . To determine the half life time of the rotation event the reaction rate  $k_{\text{rot}}$  according to Eyring has to be determined first (Eq. 1)

$$k_{\text{rot}} = \frac{k_{\text{B}}T}{h} \cdot e^{-\frac{\Delta G^\ddagger}{RT}} \quad (1)$$

Here  $k_{\text{B}}$  is the Boltzmann constant,  $T$  the temperature  $R$  and  $h$  the Planck constant. For  $T = 298.15 \text{ K}$  (room temperature) and  $348.15 \text{ K}$  (macrocyclization reaction temperature) the resulting  $k_{\text{rot}}$  values are  $6.60 \cdot 10^{-8} \text{ s}^{-1}$  and  $5.70 \cdot 10^{-5} \text{ s}^{-1}$ , respectively. The half life time  $t_{1/2}$  (Eq. 2) can be calculated by the following equation:

$$t_{1/2} = \frac{\ln(2)}{4k_{\text{rot}}} \quad (2)$$

The results of  $t_{1/2} = 30$  days at room temperature ( $25^\circ \text{C}$ ) and around 51 min at  $75^\circ \text{C}$  show the importance of elevated temperatures during the final macrocyclization reaction towards **5T-PBI**.<sup>[S9]</sup>

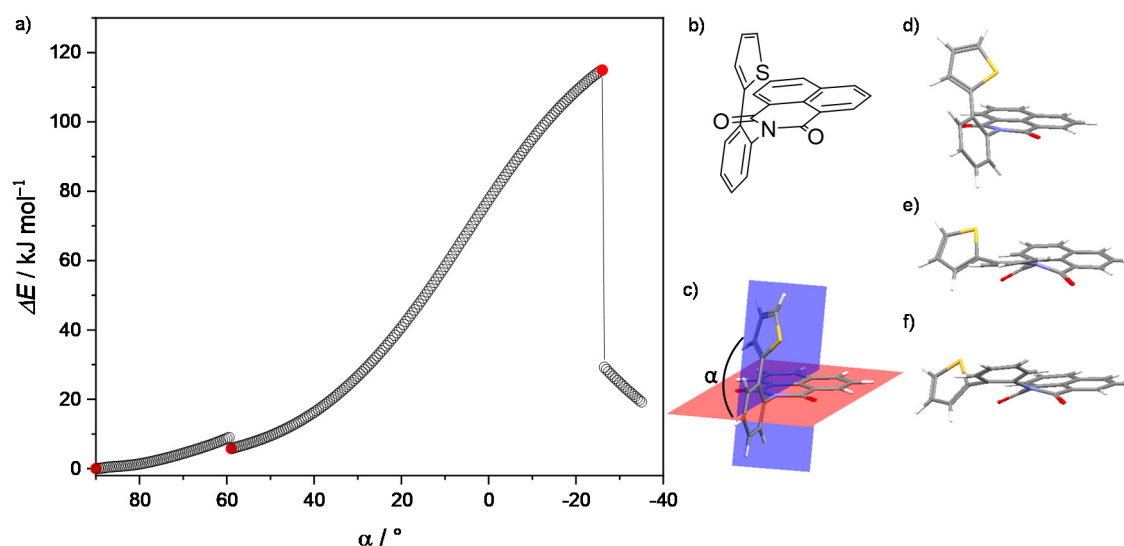

**Figure S4.** a) Plot of the change in total energy  $\Delta E$  against the dihedral angle  $\alpha$ . b) Chemical structure of the molecular fragment used for the calculations. c) Geometry optimized structure of the starting geometry for the rotational scan and the starting angle  $\alpha$  incorporated by the planes of the naphthalene (red) and phenylene (blue) subunit. d) Geometry with  $\alpha = 59^\circ$  e) Highest energy geometry with  $\alpha = -26^\circ$ . f) Geometry of the TS. All calculations were conducted with DFT at the B3LYP/6-31G(d) level of theory.

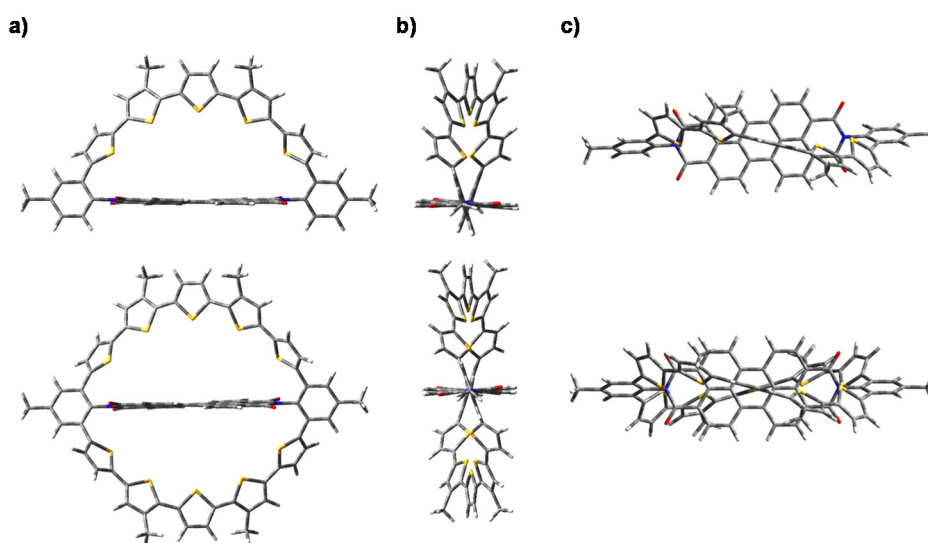

**Figure S5.** Side view (a), view along the  $N,N'$ -axis (b) and top view (c) onto the PBI  $\pi$ -surface of geometry optimized structures of **5T-PBI** and **(5T)<sub>2</sub>-PBI** (from top to bottom). The quantum mechanics calculations were carried out on the level of B3LYP density functional with the 6-31G(d) basis set as implemented in with Gaussian 16. Aliphatic chains were replaced by methyl groups. Color code: carbon = light grey, hydrogen = white, nitrogen = blue, oxygen = red, sulfur = yellow.

### Strain energies:

The strain energies of the macrocycles **(5T)<sub>2</sub>-PBI** and **5T-PBI** were calculated as follows: The connecting C-C bonds between two thiophene units of the bridges were removed virtually from the optimized geometries of **(5T)<sub>2</sub>-PBI** and **5T-PBI** and the obtained radicals were saturated by thiophene capping molecules to retain the local

environment of the two ends. Geometry optimization leads to the lowest energy conformation of the resulting structures and complete macrocyclic induced strain release of both subunits. Figure S6 shows the optimized geometries of these open macrocycles **11** and **12** as well as capping bithiophene **13**.

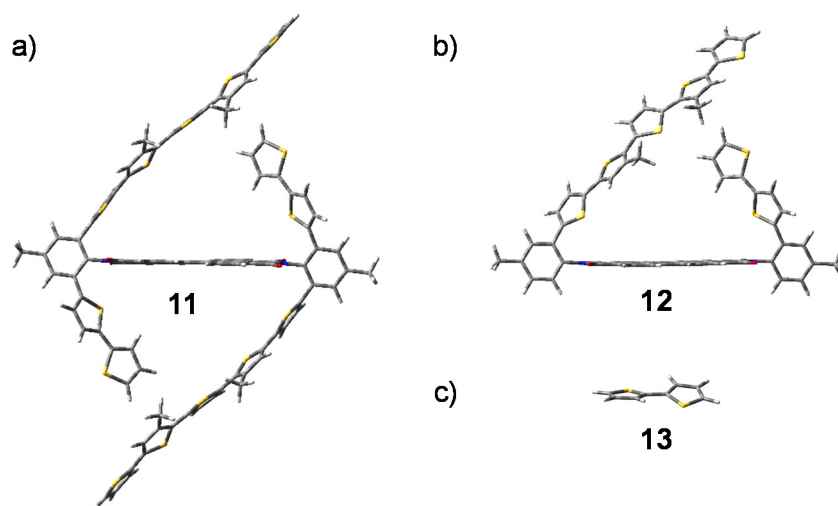

**Figure S6.** Front view of the optimized geometries of the non-cyclic structures **11** and **12** as well as bithiophene **13**. The quantum mechanics calculations were carried out on the level of B3LYP density functional with the 6-31G(d) basis set as implemented in with Gaussian 16. Aliphatic chains were replaced by methyl groups. Color code: carbon = light grey, hydrogen = white, nitrogen = blue, oxygen = red, sulfur = yellow.

The strain energies of the respective macrocycles ( $E_{\text{Strain}}$ ) were determined by comparing the lowest energy conformation of the respective macrocycles ( $E_{5\text{T-PBI}}$  or  $E_{(5\text{T})_2\text{-PBI}}$ ) to the homodesmotic reaction product<sup>[S10]</sup> of the linear structures **11** and **12** ( $E_{11}$  or  $E_{12}$ ) and the bithiophene cap **13** ( $E_{13}$ ):

$$E_{\text{Strain, (5T)}_2\text{-PBI}} = (E_{5\text{T}^2\text{-PBI}} + 2E_{13}) - E_{11} = 30.6 \text{ kJ mol}^{-1} \quad (3)$$

$$E_{\text{Strain, 5T-PBI}} = (E_{5\text{T-PBI}} + E_{13}) - E_{12} = 13.9 \text{ kJ mol}^{-1} \quad (4)$$

**Table S2:** First excited state ( $S_1$ ) energy predictions of **5T-PBI** and **(5T)<sub>2</sub>-PBI** with TDDFT at the B3LYP/6-31G(d) level of theory (H = HOMO, L = LUMO).

| Compound                    | Excitation Energy / eV | Wavelength / nm | Osc. Strength | Contribution |
|-----------------------------|------------------------|-----------------|---------------|--------------|
| <b>5T-PBI</b>               | 1.18                   | 1051            | 0.0000        | H → L (100%) |
| <b>(5T)<sub>2</sub>-PBI</b> | 1.32                   | 937             | 0.0001        | H → L (100%) |

## Electrochemistry

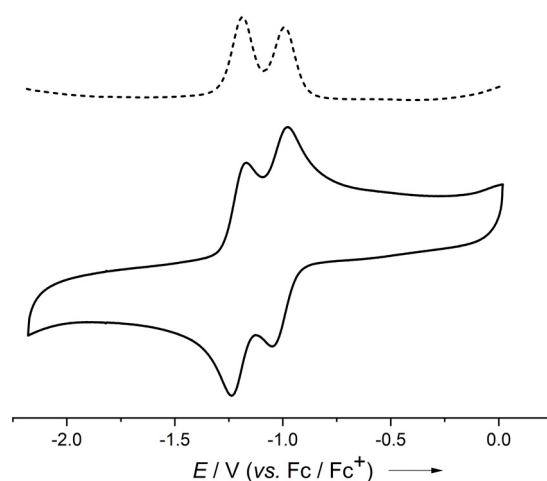

**Figure S7** Cyclic voltammogram (solid line) initiated in the forward (positive-going) scan direction (marked by an arrow) at a scan rate of  $100 \text{ mV s}^{-1}$  and differential pulse voltammogram (dashed line) of **Ref-PBI** in  $\text{CH}_2\text{Cl}_2$  with  $\text{Bu}_4\text{NPF}_6$  at room temperature ( $c_0 = 10^{-4} \text{ M}$ ).

In order to demonstrate the involvement of four electrons in the entire oxidation process of **(5T)<sub>2</sub>-PBI** we decided to utilize the baseline (recorded prior to the actual measurement) corrected DPV data which was compared to those of **5T-PBI**. It is evident that for respective reduction of both macrocyclic PBI subunits two electrons are transferred. By comparing the PBI's DPV reduction to the oligothiophene's oxidation wave integrals the relative amount of transported charges can be assigned (Figure S8).

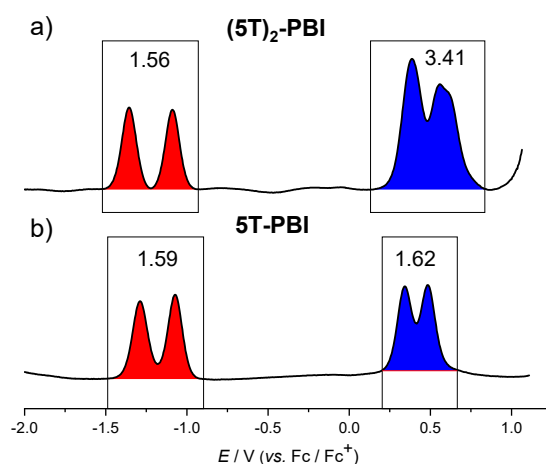

**Figure S8.** DPV measurements of a) **(5T)<sub>2</sub>-PBI** and b) **5T-PBI** in  $\text{CH}_2\text{Cl}_2$  solutions with  $\text{Bu}_4\text{NPF}_6$  at room temperature ( $c_0 = 10^{-4} \text{ M}$ ). The wave integrals for PBI reduction and oligothiophene oxidation are highlighted in red and blue, respectively. The straight black lines mark the integration limits and the values above the waves represent the absolute integral in arbitrary units. The graphs are baseline corrected to ease the integration.

The ratio of both signals in reduction and oxidation determined by integration for **5T-PBI** is  $1.62/1.59 = 1.02 \approx 1$  and for **(5T)<sub>2</sub>-PBI**  $3.41/1.56 = 2.19 \approx 2$ , respectively. The ratios prove that approximately double the amount of charges was transferred in the oxidation process of **(5T)<sub>2</sub>-PBI** in comparison to the reduction. For **5T-PBI** an equal amount of charges are involved in reduction and oxidation.

## Molecular Orbital DFT Calculations

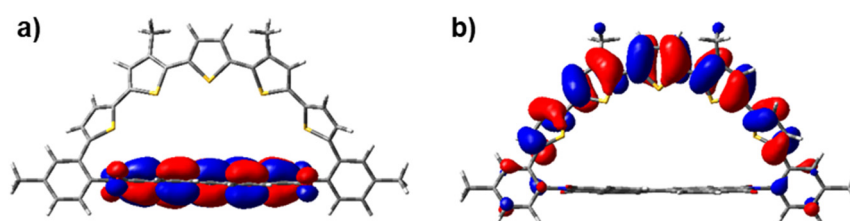

**Figure S9.** a) LUMO and b) HOMO of **5T-PBI** based on geometry optimized structures from DFT calculations. The quantum mechanics calculations were carried out on the level of B3LYP density functional with the 6-31G(d) basis set as implemented in with Gaussian 16.

## Spectroscopy in CH<sub>2</sub>Cl<sub>2</sub>

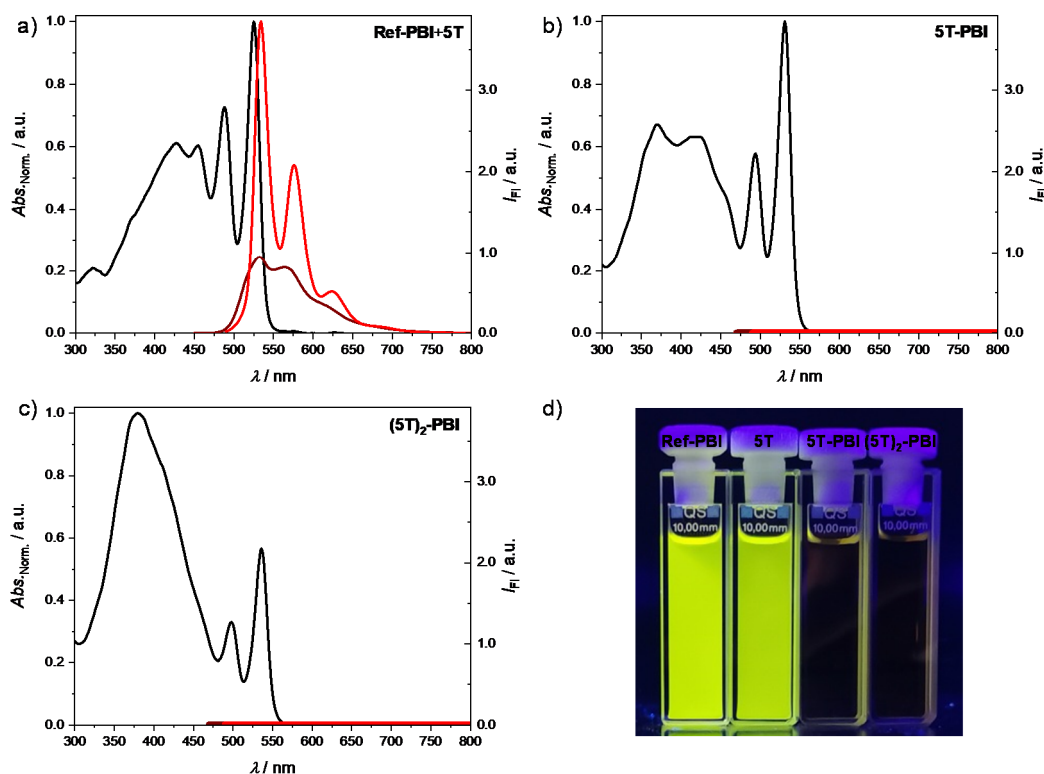

**Figure S10.** Normalized UV/Vis spectra (black lines) and emission spectra with the excitation wavelengths  $\lambda_{\text{ex}} = 400$  nm (maroon lines) and  $\lambda_{\text{ex}} = 480$  nm (red lines) of a) a 1:1 mixture of **Ref-PBI + 5T**, b) **5T-PBI** and c) **(5T)<sub>2</sub>-PBI**. All UV/Vis and emission ( $c_0 = 10^{-7}$  M) measurements were carried out in CH<sub>2</sub>Cl<sub>2</sub> at room temperature. d) Photograph of **Ref-PBI**, **5T**, **5T-PBI** and **(5T)<sub>2</sub>-PBI** (from left to right) in CH<sub>2</sub>Cl<sub>2</sub> under 365 nm UV light irradiation.

## Spectroscopy in Cyclohexane

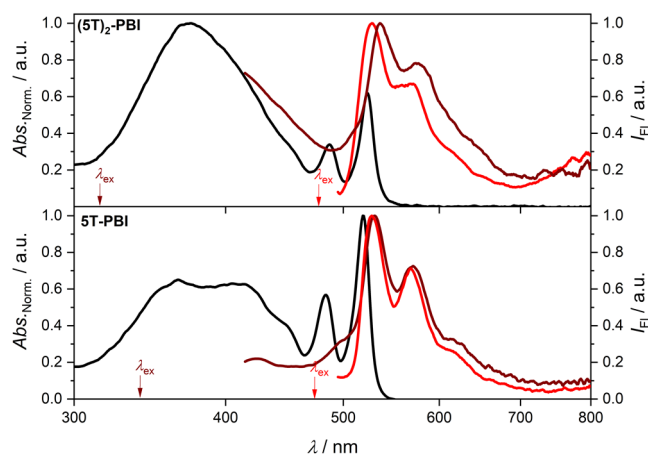

**Figure S11.** Normalized UV/Vis absorption (black solid) and emission (red:  $\lambda_{\text{ex}} = 480$  nm, maroon:  $\lambda_{\text{ex}} = 340/310$  nm) spectra of **5T-PBI** (bottom) and **(5T)<sub>2</sub>-PBI** (top) in cyclohexane at room temperature ( $c_0 = 10^{-7}$  M). The wavelengths for excitation to obtain the fluorescence spectra are highlighted by arrows.

**Table S3.** Spectroscopic properties of **5T-PBI** and **(5T)<sub>2</sub>-PBI** in cyclohexane at room temperature.

|                             | $\lambda_{\text{abs,max}}$ [a]<br>/ nm | $\lambda_{\text{em,max}}$ [a], [b]<br>/ nm | $\lambda_{\text{em,max}}$ [a], [c]<br>/ nm | $\Delta\tilde{\nu}_{\text{Stokes}}$ (PBI) [a]<br>/ $\text{cm}^{-1}$ | $\Phi_{\text{fl}}$ [a],[d]<br>/ % |
|-----------------------------|----------------------------------------|--------------------------------------------|--------------------------------------------|---------------------------------------------------------------------|-----------------------------------|
| <b>5T-PBI</b>               | 519                                    | 531                                        | 528                                        | 329                                                                 | $\ll 0.1$                         |
| <b>(5T)<sub>2</sub>-PBI</b> | 374                                    | 536                                        | 528                                        | 145                                                                 | $\ll 0.1$                         |

[a]  $c_0 = 10^{-7}$  M. [b]  $\lambda_{\text{ex}} = 340/310$  nm. [c]  $\lambda_{\text{ex}} = 480$  nm [d] The fluorescence quantum yields of the PBI were measured relative to *N,N'*-bis(2,6-diisopropylphenyl)-1,6,7,12-tetraphenoxy-perylenebis(dicarboximide)<sup>[S11]</sup> (96% in  $\text{CHCl}_3$ ) as a reference at four different excitation wavelengths in the spectral region of the PBI absorption band.

## Transient Absorption

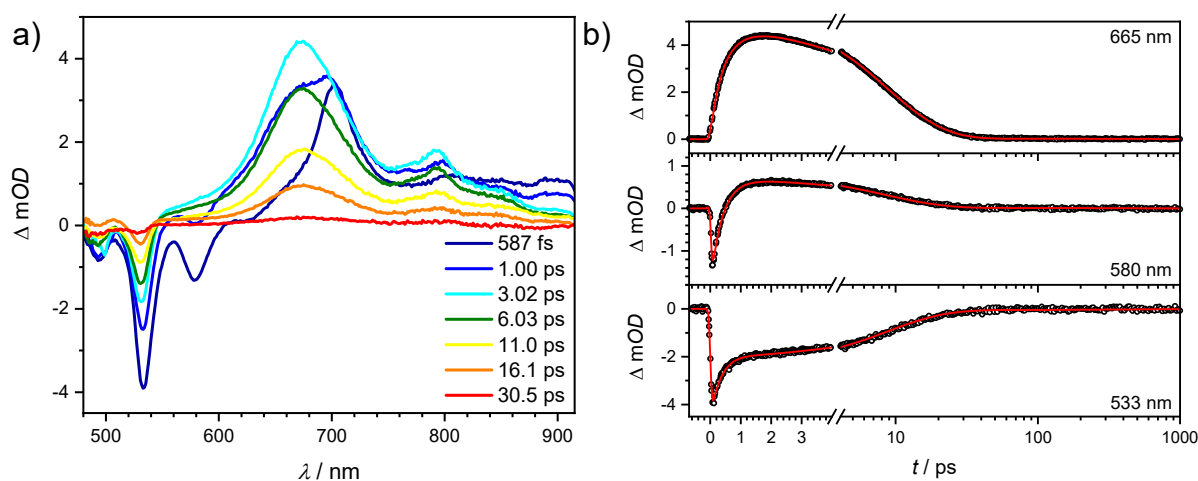

**Figure S12.** a) Transient absorption spectra of **5T-PBI** in  $\text{CH}_2\text{Cl}_2$  after excitation at 530 nm and b) time scans and fit (red line) at selected wavelengths.



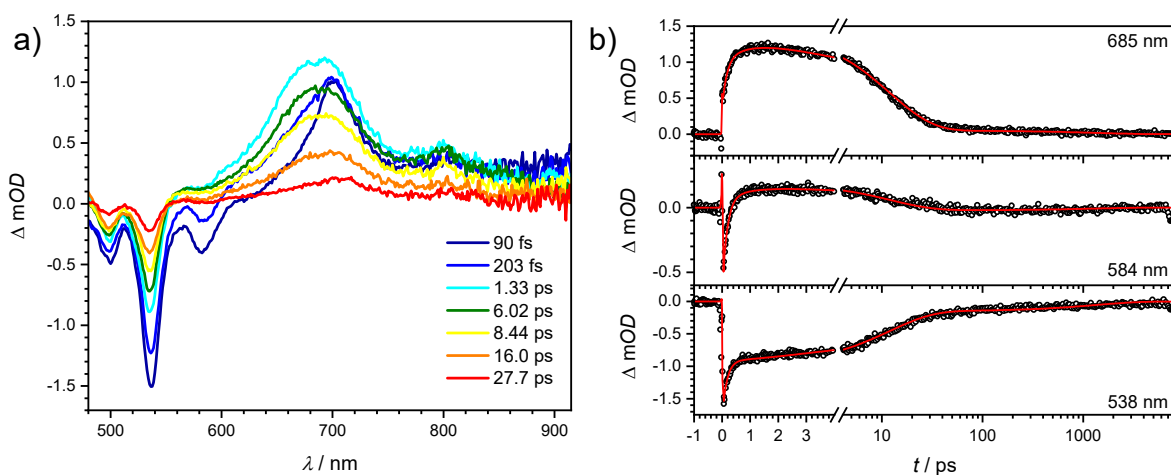

**Figure S13.** a) Transient absorption spectra of **(5T)<sub>2</sub>-PBI** in CH<sub>2</sub>Cl<sub>2</sub> after excitation at 530 nm and b) time scans and fit (red line) at selected wavelengths.

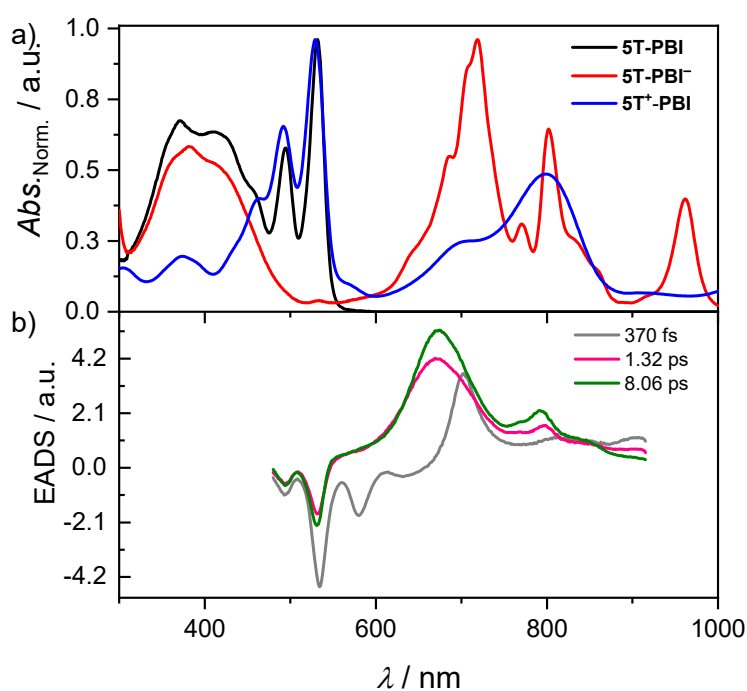

**Figure S14.** a) Normalized UV/Vis/NIR absorption spectra of **5T-PBI** (black line) upon electrochemical reduction to **5T-PBI<sup>-</sup>** (red line) and electrochemical oxidation to **5T<sup>+</sup>-PBI** (blue line) in CH<sub>2</sub>Cl<sub>2</sub> solutions with Bu<sub>4</sub>NPF<sub>6</sub> at room temperature ( $c_0 = 10^{-4}$  M). b) Evolution associated difference spectra (EADS) and lifetimes from a global fit analysis of the transient spectra of **5T-PBI** obtained by excitation at 530 nm in CH<sub>2</sub>Cl<sub>2</sub> ( $c_0 = 10^{-4}$  M) at room temperature.

## NMR Spectra

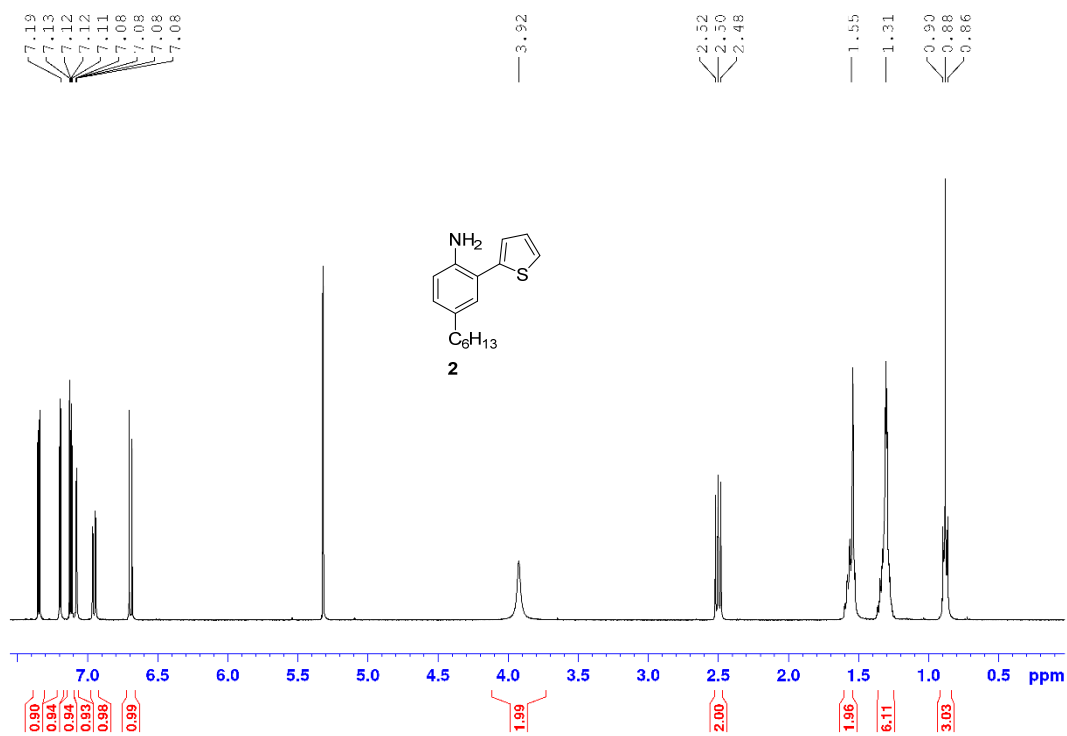

Figure S15. <sup>1</sup>H NMR spectrum of **2** in CD<sub>2</sub>Cl<sub>2</sub> at 298 K.

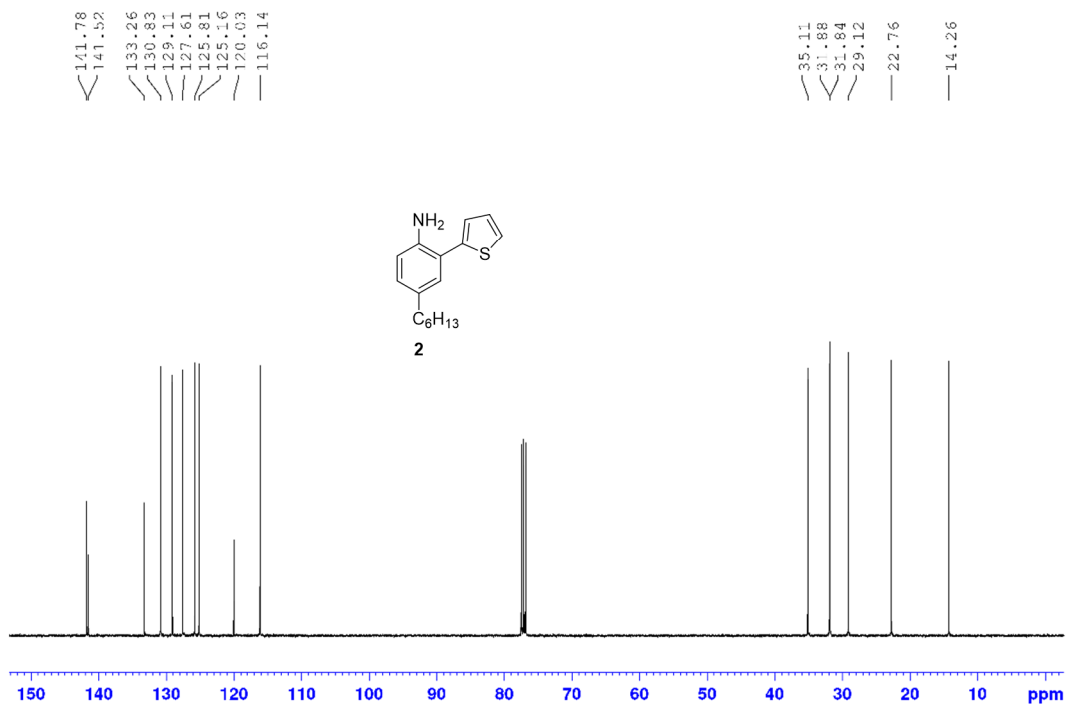

Figure S16. <sup>13</sup>C NMR spectrum of **2** in CDCl<sub>3</sub> at 298 K.

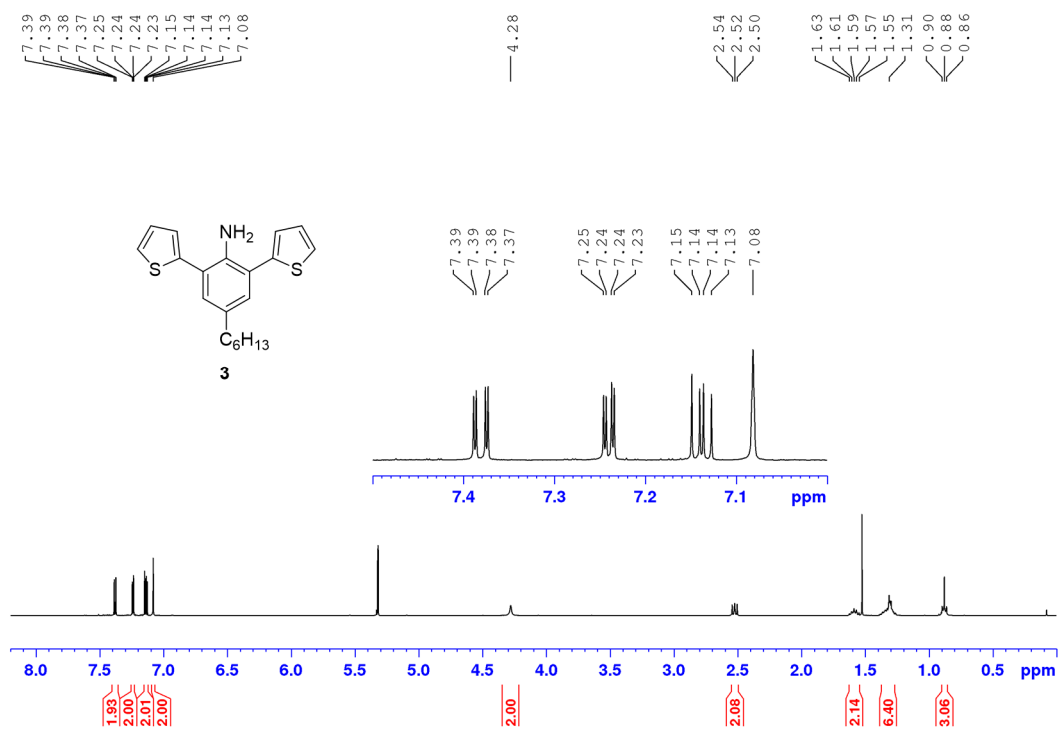

Figure S17. <sup>1</sup>H NMR spectrum of **3** in CD<sub>2</sub>Cl<sub>2</sub> at 298 K.

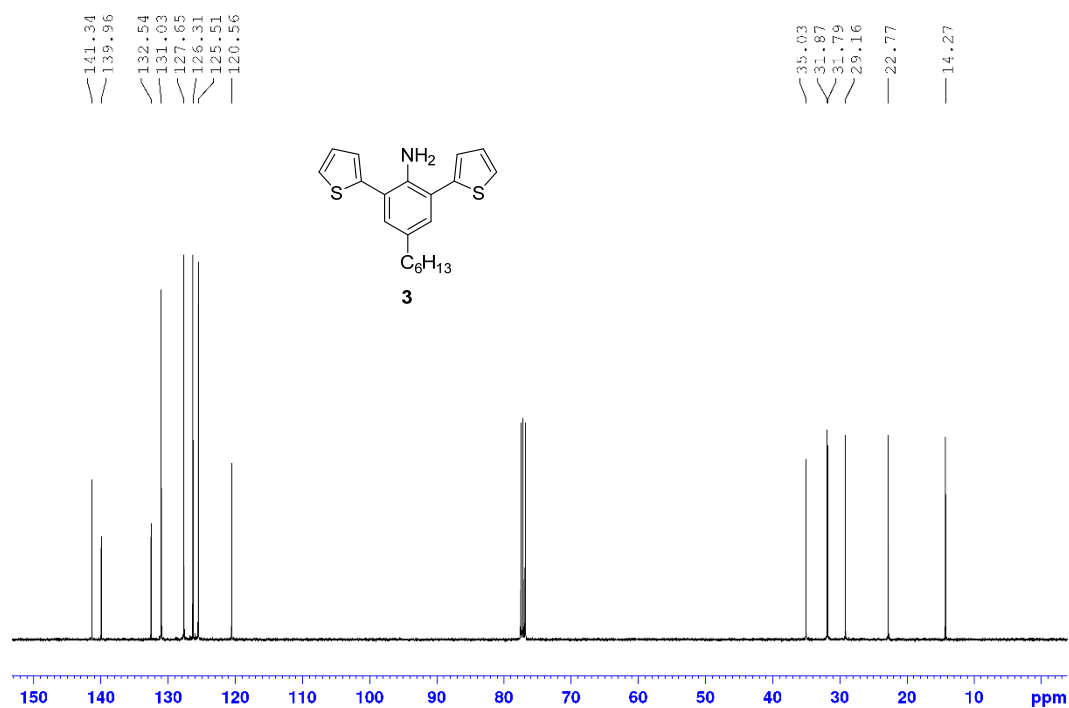

Figure S18. <sup>13</sup>C NMR spectrum of **3** in CDCl<sub>3</sub> at 298 K.



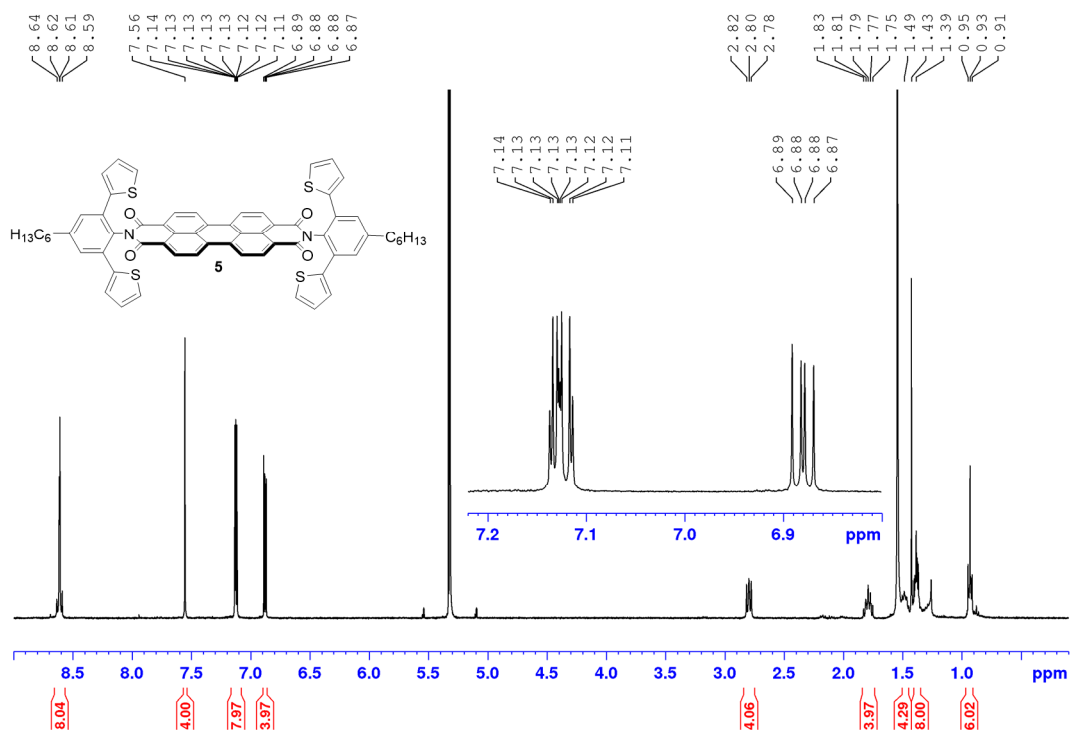

Figure S21. <sup>1</sup>H NMR spectrum of **5** in CD<sub>2</sub>Cl<sub>2</sub> at 298 K.

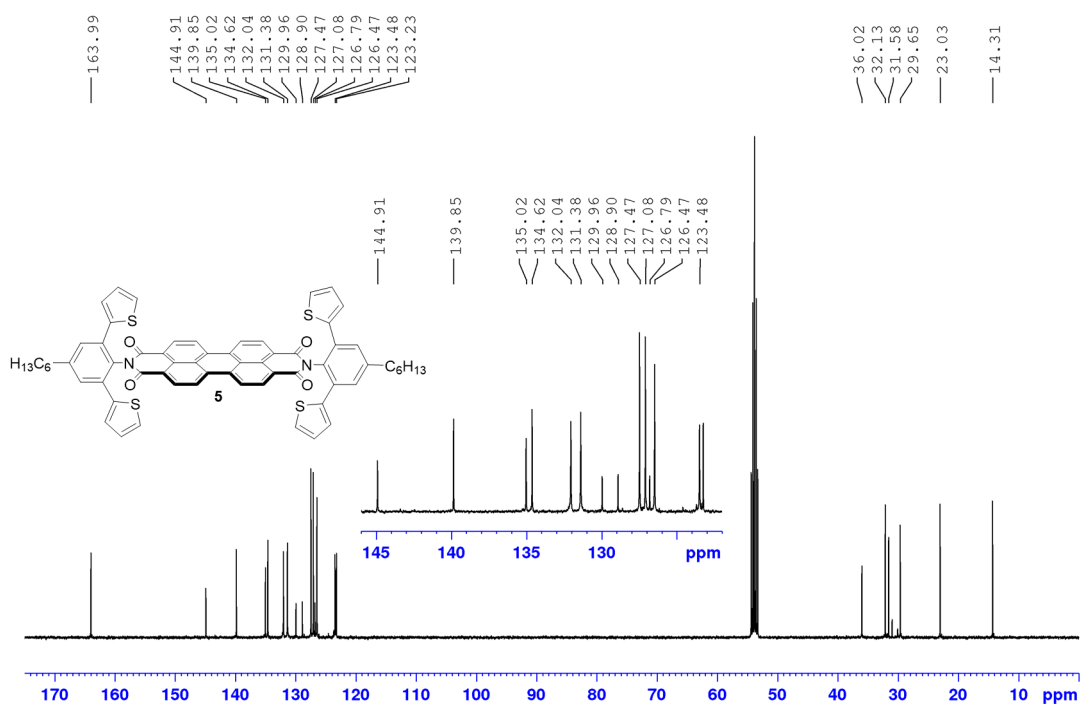

Figure S22. <sup>13</sup>C NMR spectrum of **5** in CD<sub>2</sub>Cl<sub>2</sub> at 298 K.



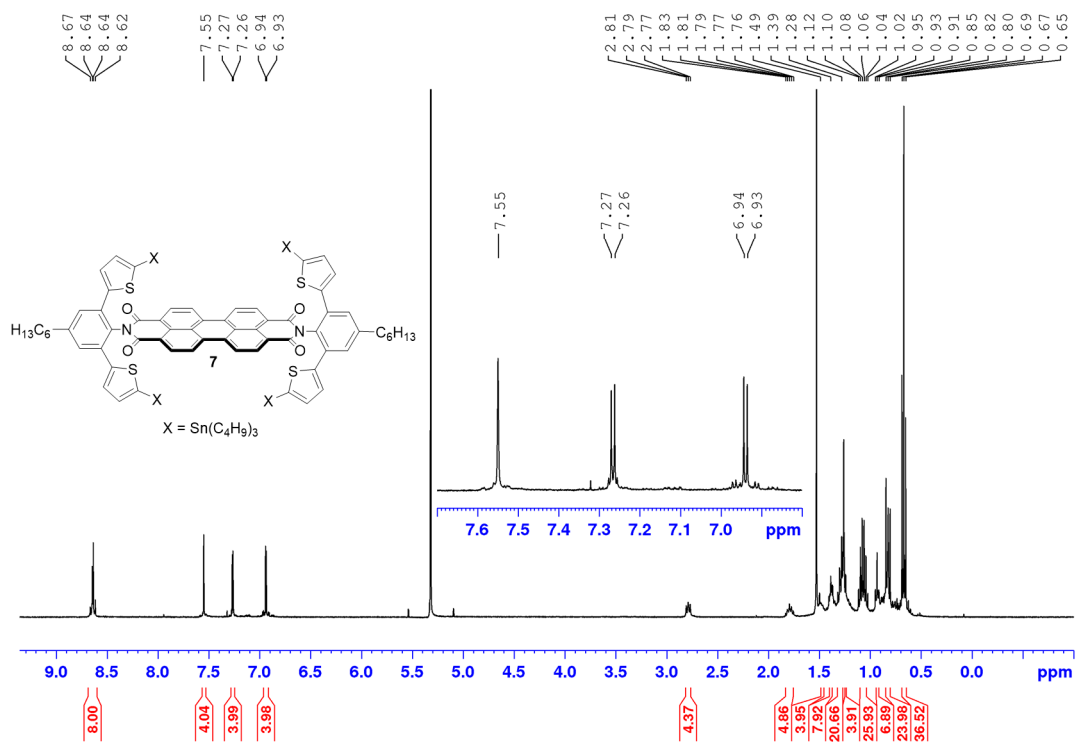

Figure S25. <sup>1</sup>H NMR spectrum of **7** in CD<sub>2</sub>Cl<sub>2</sub> at 298 K.

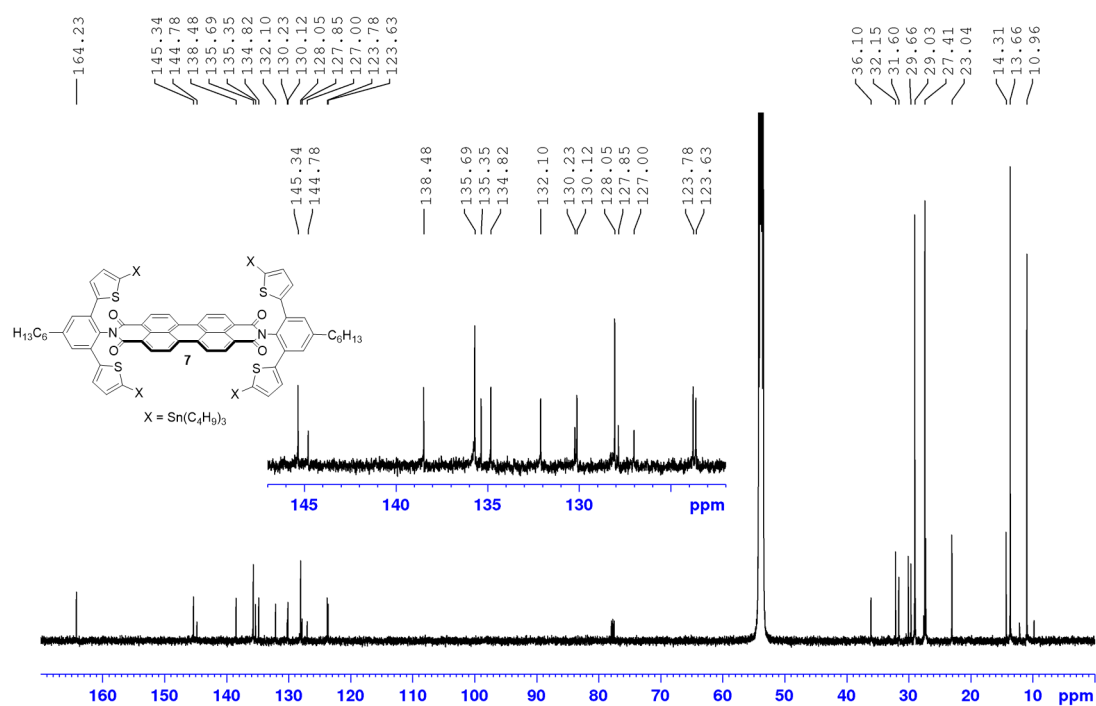

Figure S26. <sup>13</sup>C NMR spectrum of **7** in CD<sub>2</sub>Cl<sub>2</sub> at 298 K.





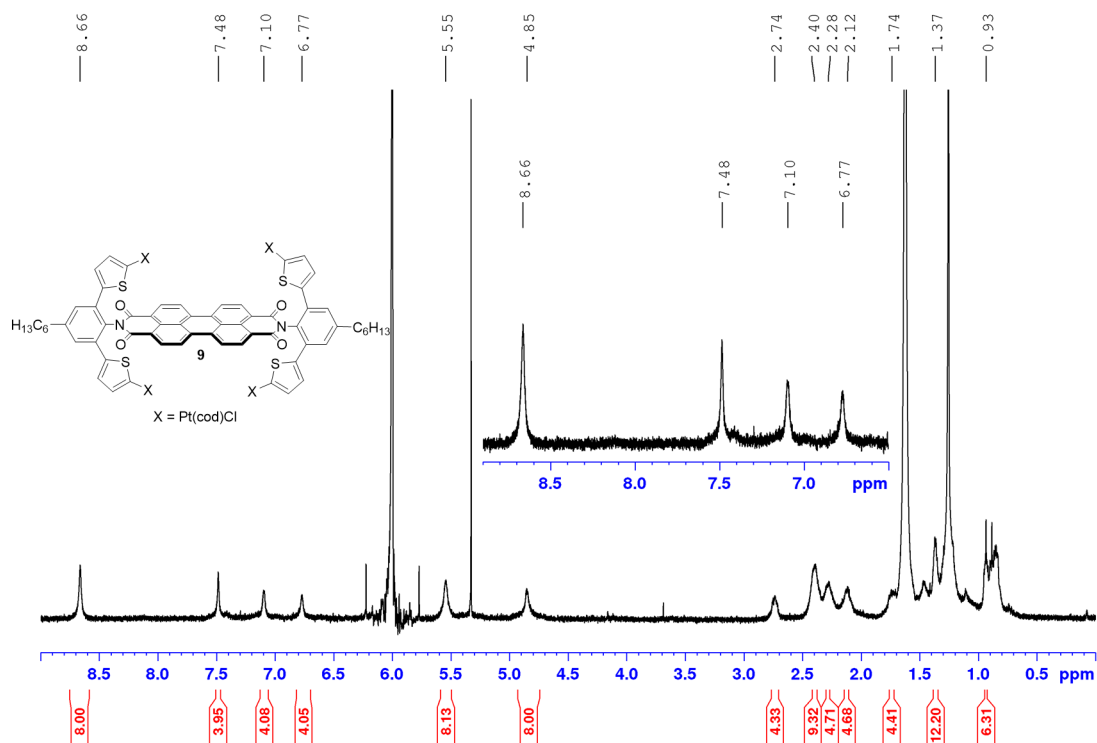

**Figure S29.**  $^1\text{H}$  NMR spectrum of **9** in  $\text{C}_2\text{D}_2\text{Cl}_4$  at 298 K.

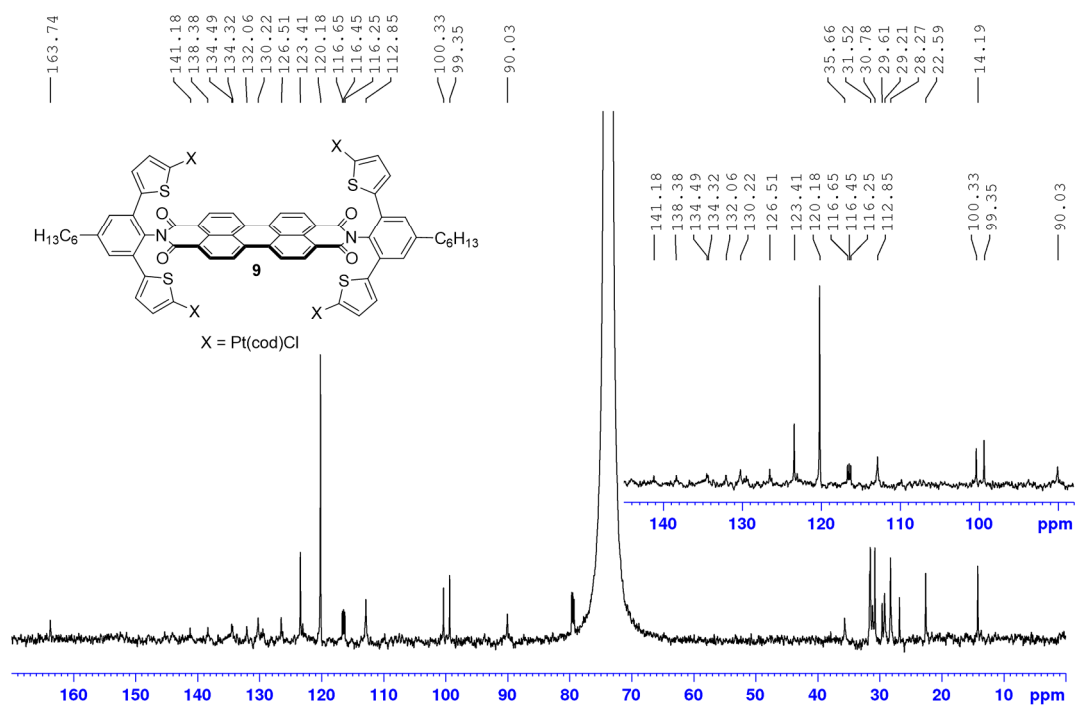

**Figure S30.**  $^{13}\text{C}$  NMR spectrum of **9** in  $\text{C}_2\text{D}_2\text{Cl}_4$  at 298 K. Residual signals of  $\text{CHCl}_3$  (79.5 ppm), H-grease (31.1 ppm) and cyclohexane (26.8 ppm).

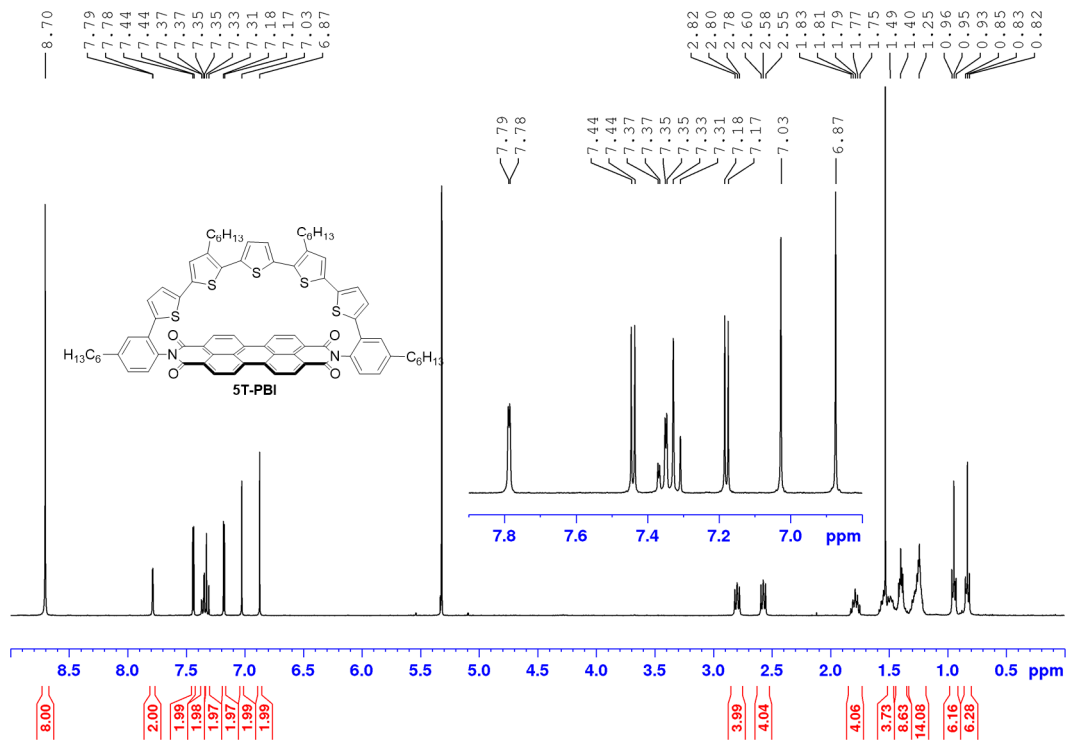

Figure S31. <sup>1</sup>H NMR spectrum of 5T-PBI in CD<sub>2</sub>Cl<sub>2</sub> at 298 K.

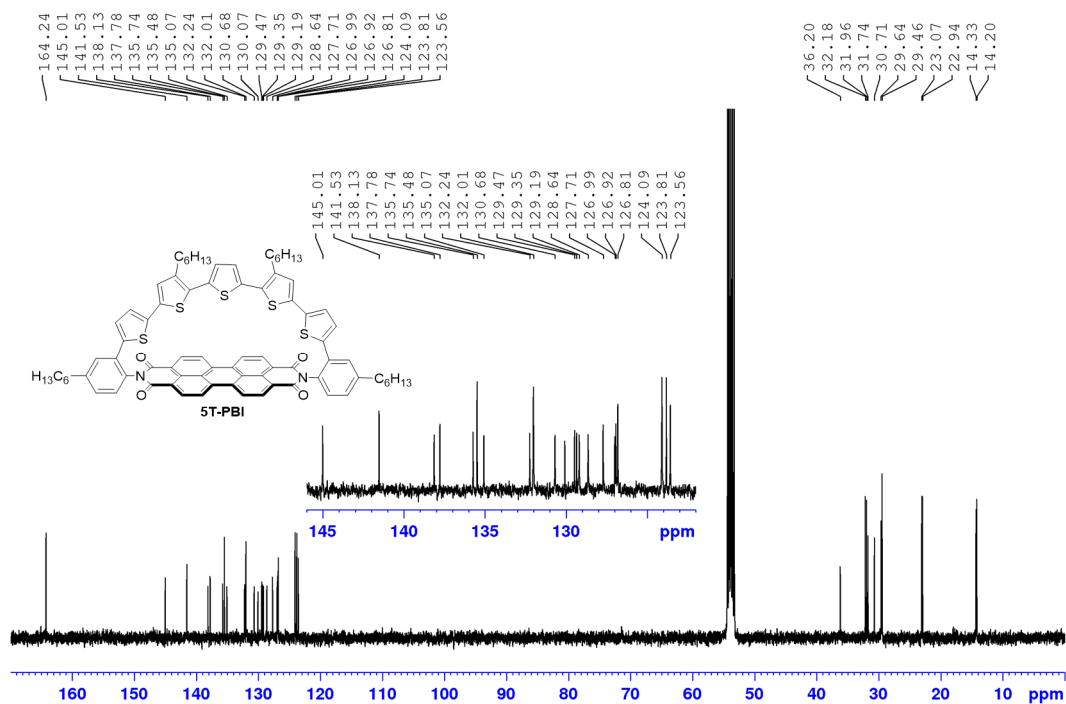

Figure S32. <sup>13</sup>C NMR spectrum of 5T-PBI in CD<sub>2</sub>Cl<sub>2</sub> at 298 K.

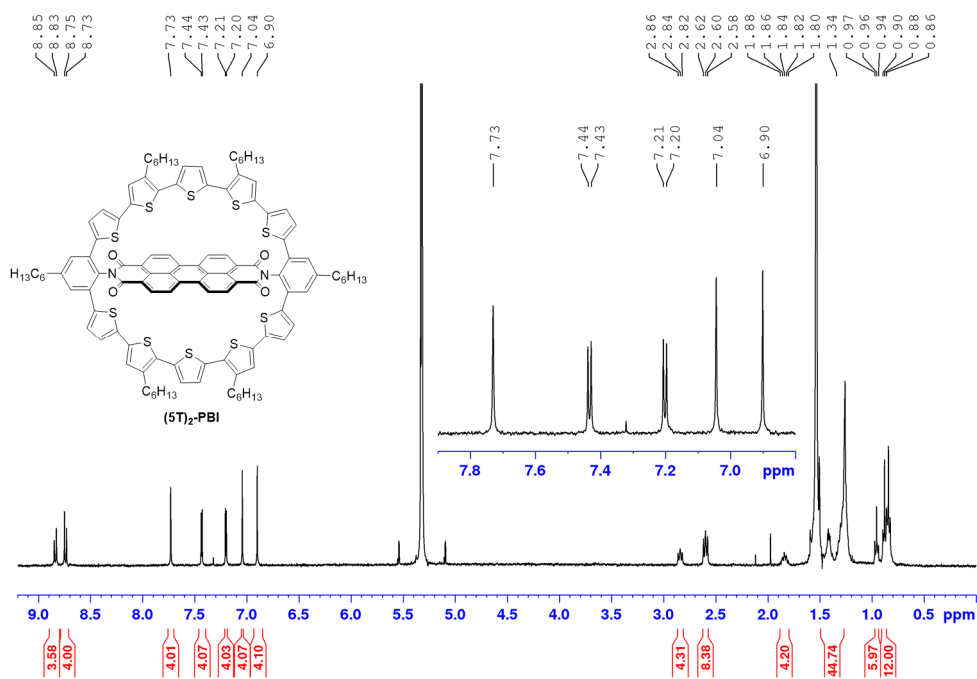

Figure S33.  $^1\text{H}$  NMR spectrum of  $(5T)_2$ -PBI in  $\text{CD}_2\text{Cl}_2$  at 298 K.

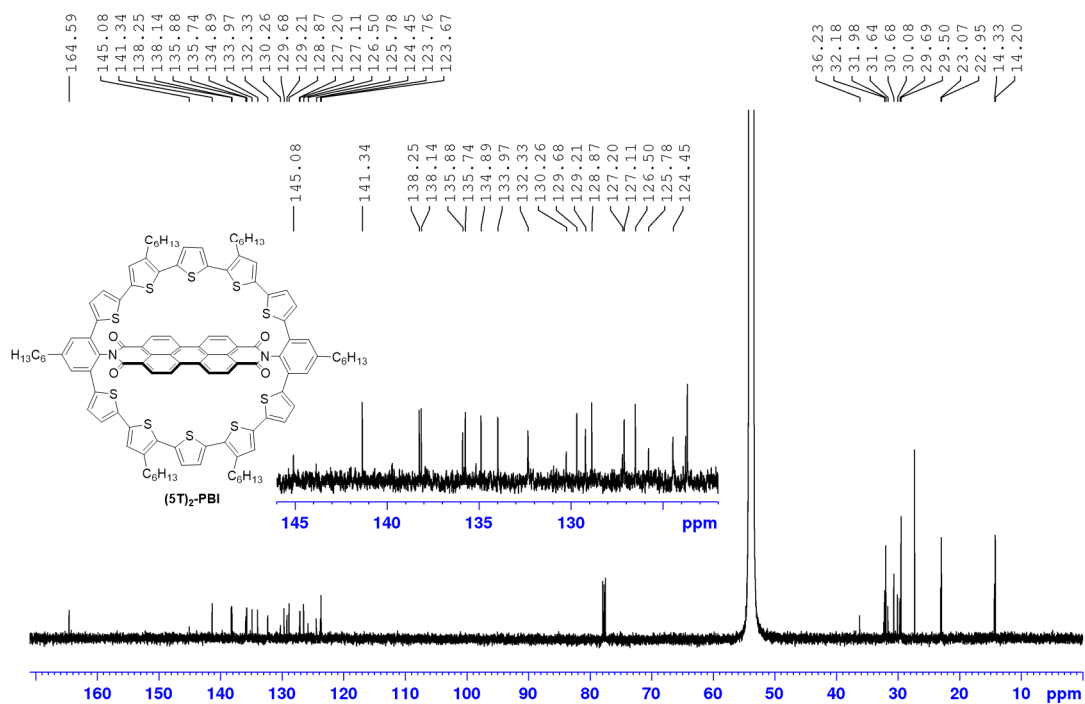

Figure S34.  $^{13}\text{C}$  NMR spectrum of  $(5T)_2$ -PBI in  $\text{CD}_2\text{Cl}_2$  at 298 K.

## Mass Spectra

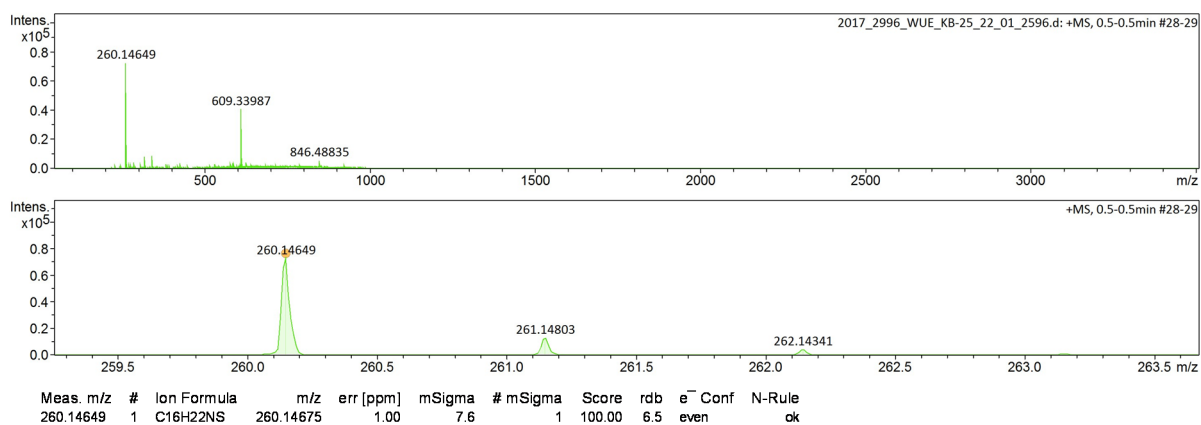

**Figure S35.** HRMS (ESI-TOF, pos. mode, acetonitrile/chloroform 1/1) spectra of **2**.

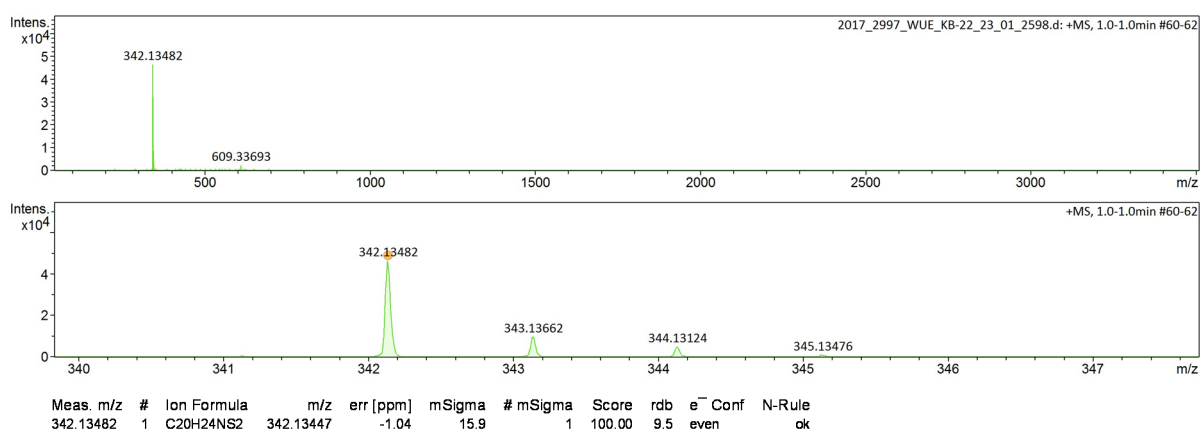

**Figure S36.** HRMS (ESI-TOF, pos. mode, acetonitrile/chloroform 1/1) spectra of **3**.

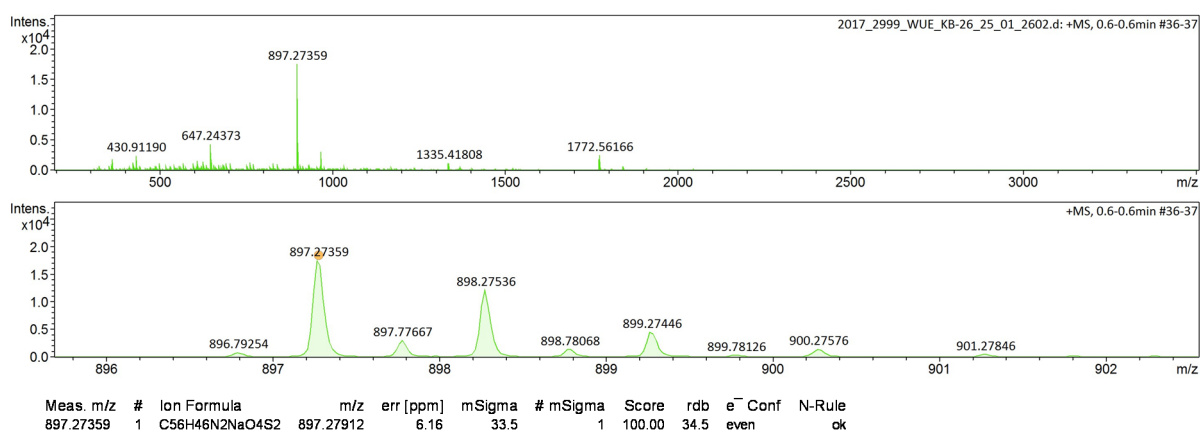

**Figure S37.** HRMS (ESI-TOF, pos. mode, acetonitrile/chloroform 1/1) spectra of **4**.

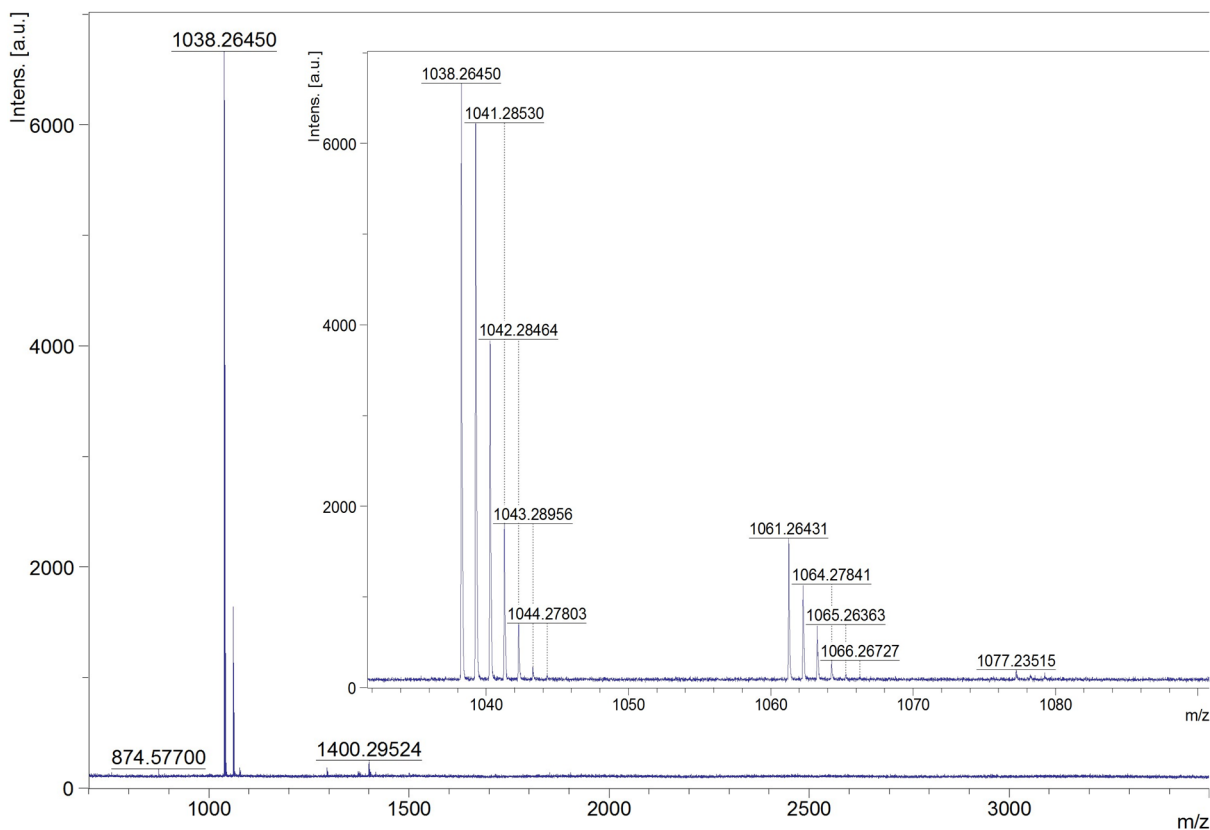

| Formula                                                                      | Mass       | Error | mSigma | DbIEq   | N rule | Electron | Configuration |
|------------------------------------------------------------------------------|------------|-------|--------|---------|--------|----------|---------------|
| C <sub>64</sub> H <sub>50</sub> N <sub>2</sub> O <sub>4</sub> S <sub>4</sub> | 1,038.2648 |       | 0.2864 | 91.7609 | 41.00  | ok       | odd           |

Figure S38. HRMS (MALDI-TOF, pos. mode, DCTB in CHCl<sub>3</sub>) spectra of **5**.

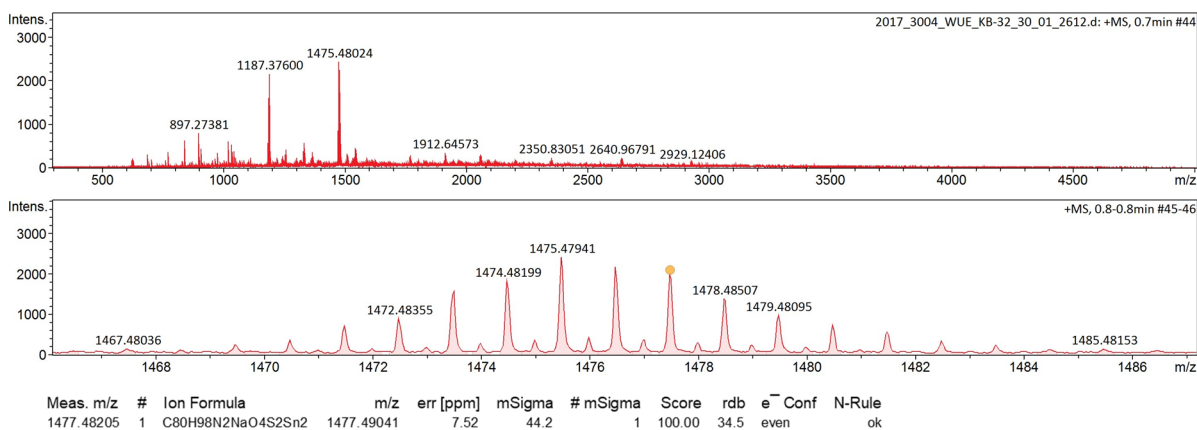

Figure S39. HRMS (MALDI-TOF, pos. mode, DCTB in CHCl<sub>3</sub>) spectra of **6**.

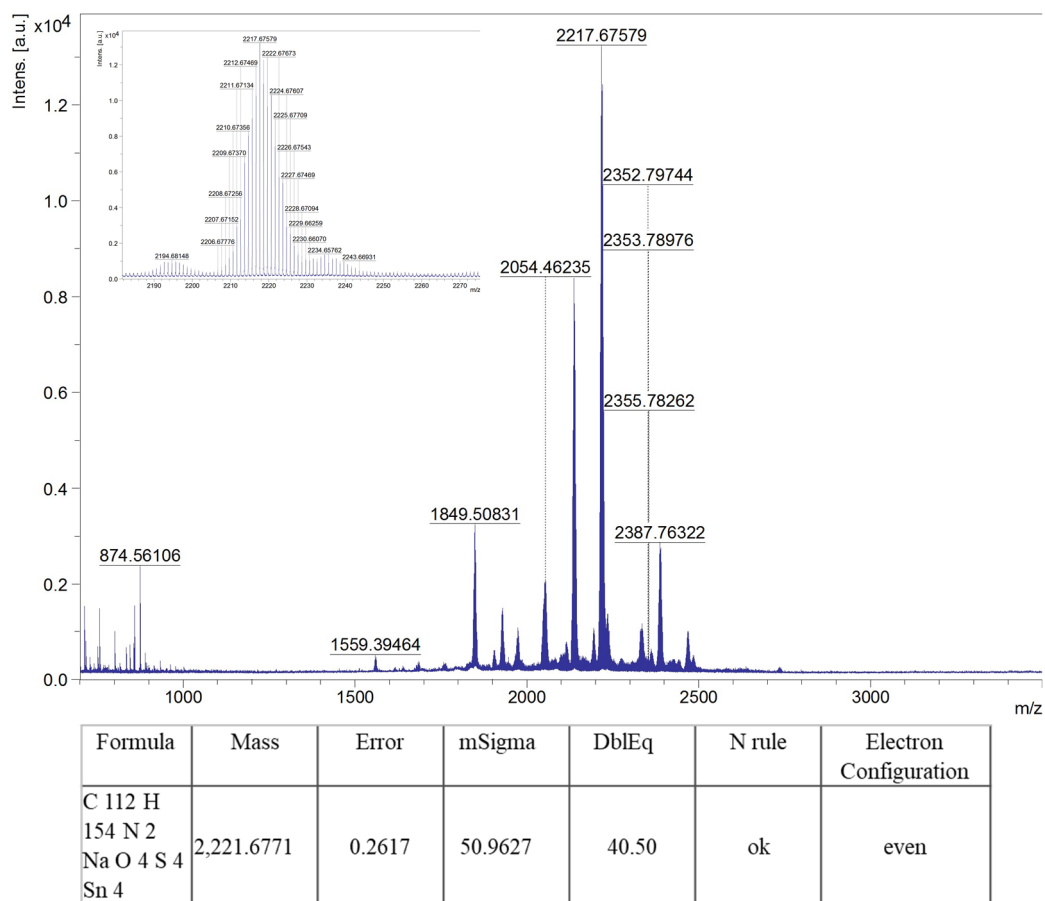

**Figure S40.** HRMS (MALDI-TOF, pos. mode, DCTB in  $\text{CHCl}_3$ ) spectra of **7**.

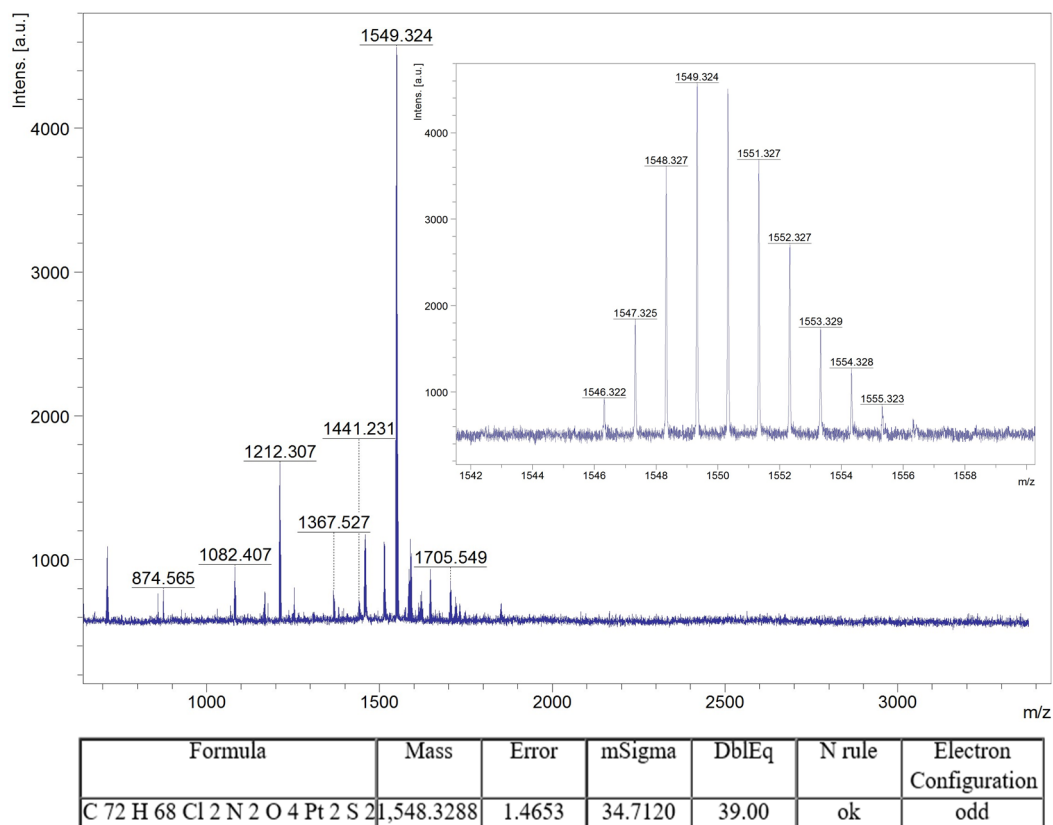

**Figure S41.** HRMS (MALDI-TOF, pos. mode, DCTB in  $\text{CHCl}_3$ ) spectra of **8**.

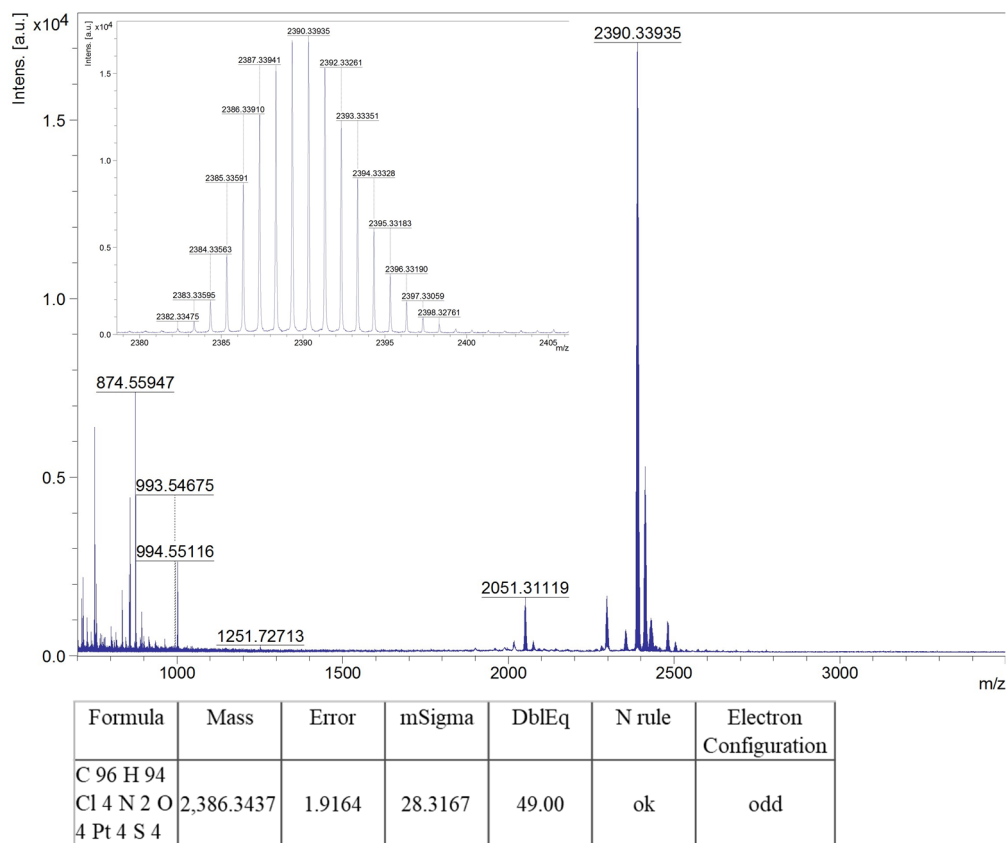

**Figure S42.** HRMS (MALDI-TOF, pos. mode, DCTB in  $\text{CHCl}_3$ ) spectra of **9**.

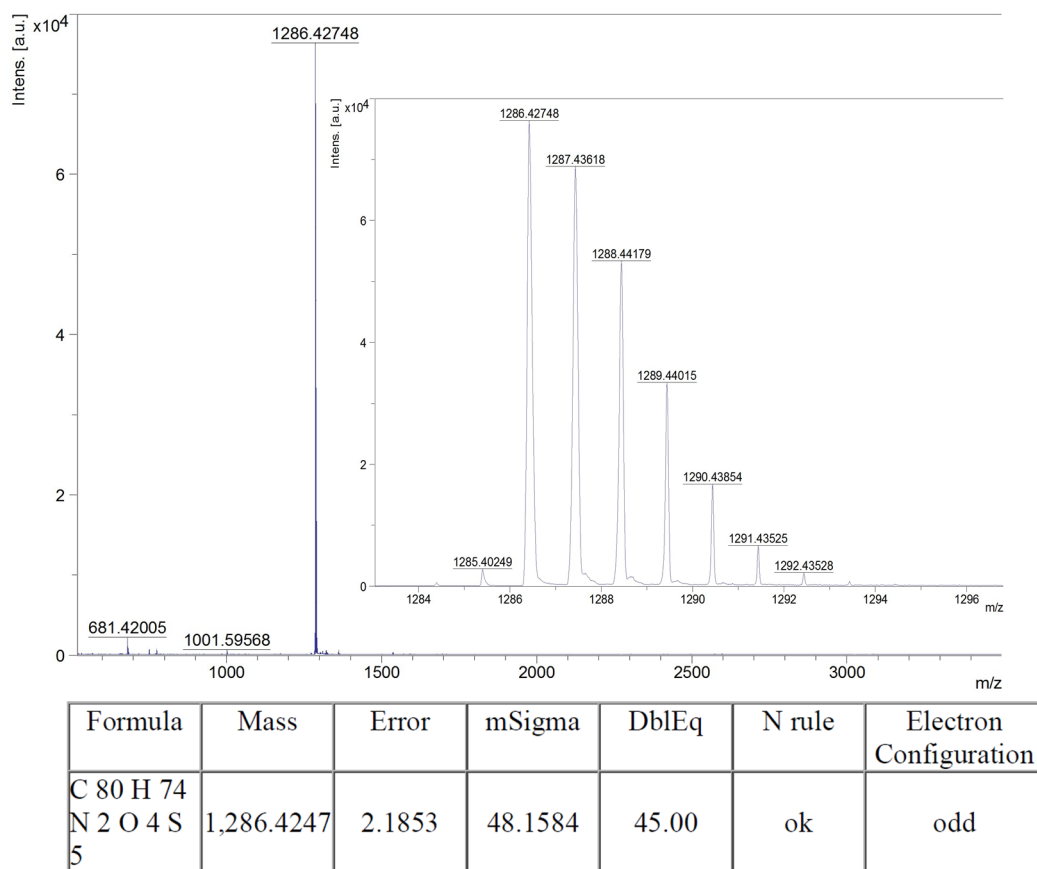

**Figure S43.** HRMS (MALDI-TOF, pos. mode, DCTB in  $\text{CHCl}_3$ ) spectra of **5T-PBI**.

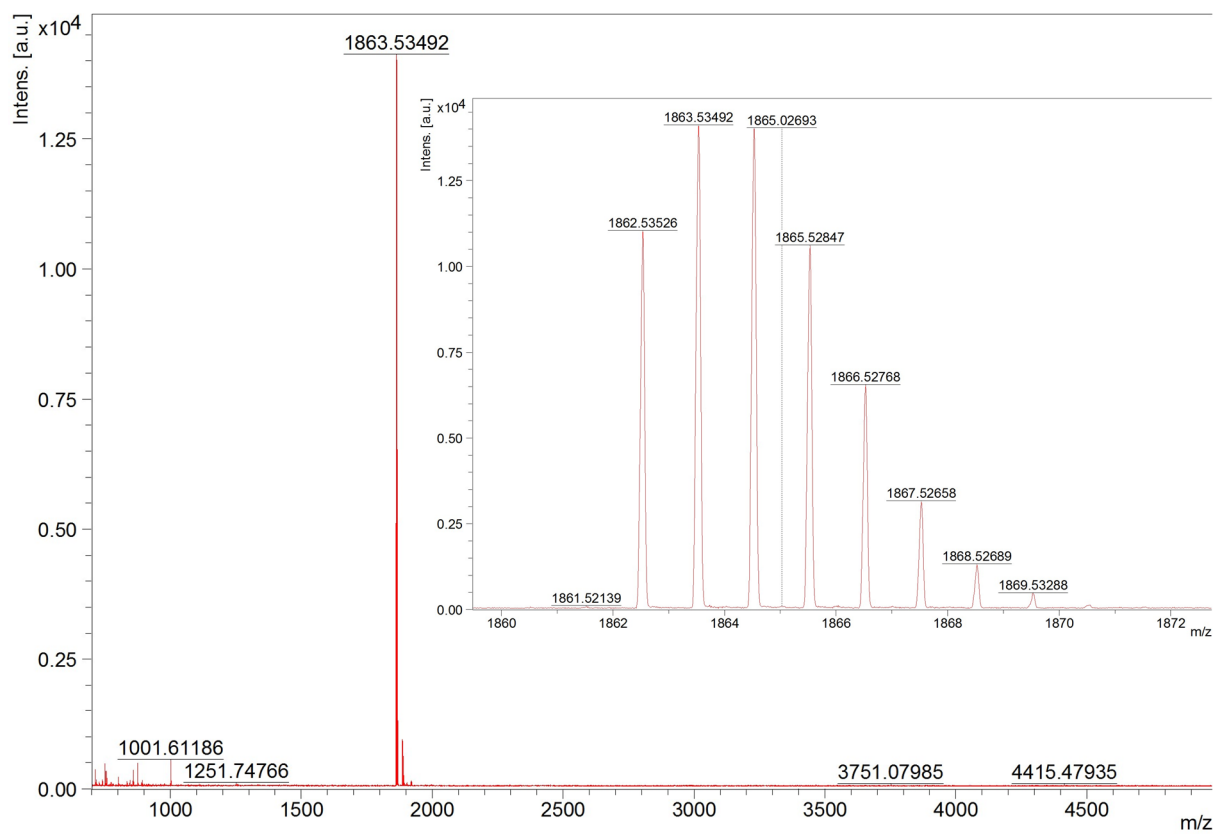

| Formula                        | Mass       | Error  | mSigma  | DblEq | N rule | Electron Configuration |
|--------------------------------|------------|--------|---------|-------|--------|------------------------|
| C 112 H<br>106 N 2 O<br>4 S 10 | 1,862.5354 | 0.0846 | 13.9310 | 61.00 | ok     | odd                    |

**Figure S44.** HRMS (MALDI-TOF, pos. mode, DCTB in  $\text{CHCl}_3$ ) spectra of **(5T)<sub>2</sub>-PBI**.



## Cartesian Coordinates Received from DFT Calculations

Final geometry:

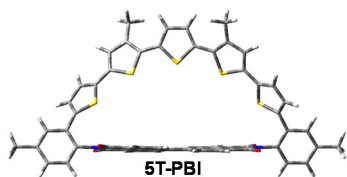

Total energy: -4708.34654570 Hartrees

|     |            |            |            |
|-----|------------|------------|------------|
| C1  | 3.0379300  | -2.5972200 | 2.2171600  |
| C2  | 1.6430100  | -2.5910200 | 2.3218800  |
| C3  | 0.8187400  | -2.5326100 | 1.1964300  |
| C4  | 1.4289000  | -2.5046600 | -0.0976600 |
| C5  | 2.8550800  | -2.4869600 | -0.1948300 |
| C6  | 3.6491100  | -2.5346100 | 0.9767800  |
| C7  | 0.6476300  | -2.4889500 | -1.2965900 |
| C8  | 1.3097700  | -2.4262600 | -2.5242200 |
| C9  | 2.7053000  | -2.3863200 | -2.6099900 |
| C10 | 3.4804400  | -2.4197700 | -1.4635800 |
| C11 | 5.1297100  | -2.5217600 | 0.9018100  |
| C12 | 4.9560900  | -2.3587000 | -1.5897800 |
| C13 | -0.6476200 | -2.4888000 | 1.2968900  |
| C14 | -0.8187400 | -2.5327500 | -1.1961300 |
| C15 | -1.4288900 | -2.5046500 | 0.0979600  |
| C16 | -2.8550700 | -2.4869400 | 0.1951300  |
| C17 | -3.6491100 | -2.5347200 | -0.9764800 |
| C18 | -3.0379300 | -2.5974800 | -2.2168500 |
| C19 | -1.6430100 | -2.5912900 | -2.3215700 |
| C20 | -1.3097700 | -2.4259700 | 2.5245100  |
| C21 | -2.7053000 | -2.3860100 | 2.6102800  |
| C22 | -3.4804400 | -2.4196000 | 1.4638700  |
| C23 | -4.9560900 | -2.3585200 | 1.5900700  |
| C24 | -5.1297000 | -2.5218700 | -0.9015100 |
| N25 | 5.6928700  | -2.3926100 | -0.3869500 |
| N26 | -5.6928700 | -2.3925600 | 0.3872300  |
| O27 | -5.8410700 | -2.6076100 | -1.8887600 |
| O28 | -5.5217400 | -2.2728500 | 2.6687400  |
| O29 | 5.5217400  | -2.2731600 | -2.6684700 |
| O30 | 5.8410700  | -2.6073900 | 1.8890700  |
| C31 | -7.1342600 | -2.3364100 | 0.4818700  |
| C32 | 7.1342700  | -2.3364700 | -0.4815900 |
| C33 | -7.8123600 | -3.4770100 | 0.9076600  |
| C34 | -9.1998400 | -3.4902300 | 0.9894600  |
| C35 | -9.9424400 | -2.3543600 | 0.6397000  |
| C36 | -9.2496200 | -1.2176800 | 0.2228900  |
| C37 | -7.8453900 | -1.1737600 | 0.1305100  |
| C38 | 7.8453900  | -1.1737800 | -0.1303600 |
| C39 | 9.2496200  | -1.2177000 | -0.2227400 |
| C40 | 9.9424500  | -2.3544300 | -0.6394200 |

|     |             |            |            |
|-----|-------------|------------|------------|
| C41 | 9.1998500   | -3.4903400 | -0.9890400 |
| C42 | 7.8123600   | -3.4771100 | -0.9072400 |
| C43 | -1.2445200  | 4.8224300  | -0.2615100 |
| C44 | -0.6942000  | 6.0856000  | -0.1413600 |
| C45 | 0.6942000   | 6.0856100  | 0.1406200  |
| C46 | 1.2445100   | 4.8224700  | 0.2609200  |
| S47 | -0.0000020  | 3.6072400  | -0.0002190 |
| S48 | 3.1870500   | 2.8454200  | 0.0661100  |
| C49 | 2.6052000   | 4.4302100  | 0.5582600  |
| C50 | 3.5979700   | 5.1285600  | 1.2354700  |
| C51 | 4.8031100   | 4.3826800  | 1.3429500  |
| C52 | 4.7596400   | 3.1238100  | 0.7810500  |
| S53 | 5.7834400   | 0.7714300  | -0.3502600 |
| C54 | 5.7921200   | 2.1094100  | 0.7823500  |
| C55 | 6.8759700   | 2.0051100  | 1.6310700  |
| C56 | 7.6772200   | 0.8626000  | 1.3869600  |
| C57 | 7.2203200   | 0.0635900  | 0.3611200  |
| C58 | -4.8031200  | 4.3825200  | -1.3434800 |
| C59 | -3.5979700  | 5.1284100  | -1.2360900 |
| C60 | -2.6052100  | 4.4301500  | -0.5588000 |
| S61 | -3.1870500  | 2.8454200  | -0.0664600 |
| C62 | -4.7596400  | 3.1237100  | -0.7814300 |
| C63 | -7.6772300  | 0.8624300  | -1.3870600 |
| C64 | -6.8759800  | 2.0049200  | -1.6313000 |
| C65 | -5.7921300  | 2.1093200  | -0.7826000 |
| S66 | -5.7834400  | 0.7714700  | 0.3501600  |
| C67 | -7.2203200  | 0.0635500  | -0.3611300 |
| C68 | 11.4512200  | -2.3627100 | -0.7163300 |
| C69 | -11.4512100 | -2.3626400 | 0.7166200  |
| C70 | -3.4443900  | 6.5053400  | -1.8253500 |
| C71 | 3.4443900   | 6.5055500  | 1.8245700  |
| H72 | 3.6621800   | -2.6416200 | 3.1031900  |
| H73 | 1.2096400   | -2.6331000 | 3.3140400  |
| H74 | 0.7446200   | -2.3939900 | -3.4480400 |
| H75 | 3.2019800   | -2.3250900 | -3.5724300 |
| H76 | -3.6621800  | -2.6419800 | -3.1028800 |
| H77 | -1.2096400  | -2.6334900 | -3.3137200 |
| H78 | -0.7446200  | -2.3935800 | 3.4483200  |
| H79 | -3.2019700  | -2.3246700 | 3.5727100  |
| H80 | -9.7093400  | -4.3884700 | 1.3294000  |
| H81 | -9.8062600  | -0.3175300 | -0.0218800 |
| H82 | 9.8062600   | -0.3175200 | 0.0219200  |
| H83 | 9.7093400   | -4.3886200 | -1.3288800 |
| H84 | -1.2768500  | 6.9938100  | -0.2300500 |
| H85 | 1.2768500   | 6.9938400  | 0.2292000  |
| H86 | 5.6904800   | 4.7735900  | 1.8303300  |
| H87 | 7.0608600   | 2.7068400  | 2.4368700  |
| H88 | 8.5440500   | 0.6004700  | 1.9836000  |
| H89 | -5.6904900  | 4.7733700  | -1.8308900 |
| H90 | -8.5440600  | 0.6002400  | -1.9836600 |

|      |             |            |            |
|------|-------------|------------|------------|
| H91  | -7.0608700  | 2.7065500  | -2.4371800 |
| H92  | 11.8663000  | -1.3632600 | -0.5542300 |
| H93  | 11.8831300  | -3.0292000 | 0.0412000  |
| H94  | 11.7992200  | -2.7176600 | -1.6935100 |
| H95  | -11.8831200 | -3.0292100 | -0.0408300 |
| H96  | -11.7992100 | -2.7174700 | 1.6938400  |
| H97  | -11.8663000 | -1.3632000 | 0.5544100  |
| H98  | -4.1968100  | 6.6777100  | -2.6014600 |
| H99  | -3.5711300  | 7.2918800  | -1.0693100 |
| H100 | -2.4547000  | 6.6412500  | -2.2745000 |
| H101 | 2.4546800   | 6.6415200  | 2.2736900  |
| H102 | 4.1967900   | 6.6780200  | 2.6006700  |
| H103 | 3.5711300   | 7.2920100  | 1.0684400  |
| H104 | 7.2379700   | -4.3591700 | -1.1720700 |
| H105 | -7.2379700  | -4.3590300 | 1.1725900  |

Final geometry:

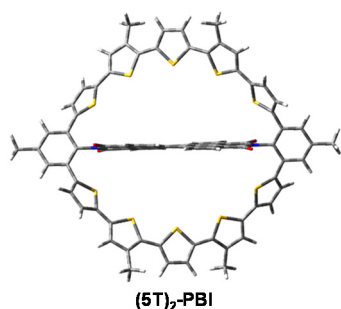

Total energy: -7544.84772028 Hartrees

|     |            |            |            |
|-----|------------|------------|------------|
| C1  | -2.8754100 | -0.1459000 | -2.4185000 |
| C2  | -1.4773400 | -0.1128900 | -2.4281000 |
| C3  | -0.7341900 | -0.0306600 | -1.2490700 |
| C4  | -1.4317400 | -0.0009190 | -0.0001740 |
| C5  | -2.8607500 | -0.0008510 | -0.0003510 |
| C6  | -3.5706500 | -0.0803700 | -1.2232800 |
| C7  | -0.7344900 | 0.0287800  | 1.2488900  |
| C8  | -1.4779100 | 0.1110600  | 2.4277400  |
| C9  | -2.8759800 | 0.1442100  | 2.4178000  |
| C10 | -3.5709200 | 0.0787600  | 1.2224100  |
| C11 | -5.0501900 | -0.1201900 | -1.2474300 |
| C12 | -5.0504600 | 0.1188600  | 1.2462100  |
| C13 | 0.7344800  | 0.0285200  | -1.2488900 |
| C14 | 0.7341800  | -0.0304000 | 1.2490800  |
| C15 | 1.4317400  | -0.0009200 | 0.0001770  |
| C16 | 2.8607400  | -0.0008530 | 0.0003540  |
| C17 | 3.5706400  | -0.0801200 | 1.2233000  |
| C18 | 2.8754100  | -0.1454000 | 2.4185300  |
| C19 | 1.4773300  | -0.1123800 | 2.4281300  |
| C20 | 1.4779100  | 0.1105500  | -2.4277700 |
| C21 | 2.8759700  | 0.1437100  | -2.4178300 |
| C22 | 3.5709200  | 0.0785000  | -1.2224200 |
| C23 | 5.0504500  | 0.1186100  | -1.2462300 |

|     |             |            |            |
|-----|-------------|------------|------------|
| C24 | 5.0501900   | -0.1199400 | 1.2474600  |
| N25 | -5.7018600  | -0.0006340 | -0.0007020 |
| N26 | 5.7018600   | -0.0006390 | 0.0007050  |
| O27 | 5.6947500   | -0.2537200 | 2.2753800  |
| O28 | 5.6952200   | 0.2526100  | -2.2739700 |
| O29 | -5.6952300  | 0.2530800  | 2.2739200  |
| O30 | -5.6947600  | -0.2541800 | -2.2753200 |
| C31 | 7.1450100   | -0.0009150 | 0.0011800  |
| C32 | -7.1450100  | -0.0009070 | -0.0011700 |
| C33 | 7.8400100   | -1.1625100 | -0.3883500 |
| C34 | 9.2437300   | -1.1357700 | -0.3823900 |
| C35 | 9.9604500   | -0.0009390 | -0.0007000 |
| C36 | 9.2442500   | 1.1356500  | 0.3766100  |
| C37 | 7.8403900   | 1.1615300  | 0.3873500  |
| C38 | -7.8403900  | 1.1614600  | -0.3875900 |
| C39 | -9.2442500  | 1.1355800  | -0.3768500 |
| C40 | -9.9604500  | -0.0009300 | 0.0006940  |
| C41 | -9.2437300  | -1.1356900 | 0.3826100  |
| C42 | -7.8400100  | -1.1624300 | 0.3885800  |
| C43 | 1.2247100   | 7.1553700  | 0.3419900  |
| C44 | 0.6834800   | 8.4183500  | 0.1856500  |
| C45 | -0.6834800  | 8.4183100  | -0.1872800 |
| C46 | -1.2247000  | 7.1553000  | -0.3433900 |
| S47 | 0.0000060   | 5.9400300  | -0.0005890 |
| S48 | -3.1850700  | 5.1863100  | -0.2682000 |
| C49 | -2.5633500  | 6.7643000  | -0.7319500 |
| C50 | -3.5024100  | 7.4597600  | -1.4844600 |
| C51 | -4.7002200  | 6.7168100  | -1.6711100 |
| C52 | -4.7017800  | 5.4634900  | -1.0962100 |
| S53 | -5.8346700  | 3.1473900  | 0.0022900  |
| C54 | -5.7305300  | 4.4467500  | -1.1691900 |
| C55 | -6.7179000  | 4.3061200  | -2.1233700 |
| C56 | -7.5318300  | 3.1619700  | -1.9292000 |
| C57 | -7.1778400  | 2.3986800  | -0.8381800 |
| C58 | 4.7002200   | 6.7171300  | 1.6698000  |
| C59 | 3.5024100   | 7.4600500  | 1.4830100  |
| C60 | 2.5633600   | 6.7644400  | 0.7306300  |
| S61 | 3.1850800   | 5.1863700  | 0.2671700  |
| C62 | 4.7017900   | 5.4637000  | 1.0951300  |
| C63 | 7.5318400   | 3.1623500  | 1.9285700  |
| C64 | 6.7179100   | 4.3065400  | 2.1225100  |
| C65 | 5.7305400   | 4.4469800  | 1.1683100  |
| S66 | 5.8346700   | 3.1473900  | -0.0029100 |
| C67 | 7.1778400   | 2.3988500  | 0.8376900  |
| C68 | -11.4710000 | -0.0108100 | -0.0276300 |
| C69 | 11.4710000  | -0.0108200 | 0.0276700  |
| C70 | 3.3014400   | 8.8310100  | 2.0719800  |
| C71 | -3.3014400  | 8.8306100  | -2.0736900 |
| H72 | -3.4366800  | -0.2197800 | -3.3437800 |
| H73 | -0.9753500  | -0.1628400 | -3.3869500 |

|      |             |            |            |
|------|-------------|------------|------------|
| H74  | -0.9761500  | 0.1609700  | 3.3867200  |
| H75  | -3.4374700  | 0.2181800  | 3.3429400  |
| H76  | 3.4366700   | -0.2190800 | 3.3438300  |
| H77  | 0.9753500   | -0.1621300 | 3.3869900  |
| H78  | 0.9761500   | 0.1602600  | -3.3867500 |
| H79  | 3.4374700   | 0.2174800  | -3.3429800 |
| H80  | 9.7779900   | -2.0373700 | -0.6680200 |
| H81  | 9.7788500   | 2.0398800  | 0.6529900  |
| H82  | -9.7788500  | 2.0397500  | -0.6534200 |
| H83  | -9.7779900  | -2.0372300 | 0.6684200  |
| H84  | 1.2592400   | 9.3265100  | 0.3125200  |
| H85  | -1.2592400  | 9.3264400  | -0.3143200 |
| H86  | -5.5492200  | 7.1054300  | -2.2243200 |
| H87  | -6.8188500  | 4.9788000  | -2.9679200 |
| H88  | -8.3274800  | 2.8705300  | -2.6061600 |
| H89  | 5.5492200   | 7.1058600  | 2.2229400  |
| H90  | 8.3275000   | 2.8710500  | 2.6055800  |
| H91  | 6.8188700   | 4.9793900  | 2.9669200  |
| H92  | -11.8803000 | 0.9894800  | 0.1475700  |
| H93  | -11.8454300 | -0.3516300 | -1.0019200 |
| H94  | -11.8814700 | -0.6838200 | 0.7322900  |
| H95  | 11.8453900  | -0.3511700 | 1.0021400  |
| H96  | 11.8814800  | -0.6842100 | -0.7319100 |
| H97  | 11.8803200  | 0.9893800  | -0.1480000 |
| H98  | 3.9897900   | 8.9957000  | 2.9070300  |
| H99  | 3.4872200   | 9.6251000  | 1.3362700  |
| H100 | 2.2790900   | 8.9623100  | 2.4422800  |
| H101 | -2.2790800  | 8.9618500  | -2.4440200 |
| H102 | -3.9897800  | 8.9951400  | -2.9087800 |
| H103 | -3.4872200  | 9.6248300  | -1.3381300 |
| C104 | -7.1761600  | -2.3975400 | 0.8434600  |
| S105 | -5.8372800  | -3.1504100 | -0.0000470 |
| C106 | -7.5251800  | -3.1554900 | 1.9396700  |
| C107 | -5.7278300  | -4.4443600 | 1.1770100  |
| C108 | -6.7105100  | -4.2990000 | 2.1352400  |
| H109 | -8.3174900  | -2.8605900 | 2.6190500  |
| C110 | -4.6994700  | -5.4615000 | 1.1036500  |
| H111 | -6.8074500  | -4.9677000 | 2.9834200  |
| S112 | -3.1848600  | -5.1858500 | 0.2713000  |
| C113 | -4.6964300  | -6.7136400 | 1.6810500  |
| C114 | -2.5619100  | -6.7628500 | 0.7366400  |
| C115 | -3.4989800  | -7.4569000 | 1.4928400  |
| H116 | -5.5440900  | -7.1011900 | 2.2370800  |
| C117 | -1.2240300  | -7.1542100 | 0.3456500  |
| C118 | -3.2962900  | -8.8266200 | 2.0841000  |
| C119 | -0.6831600  | -8.4172200 | 0.1885800  |
| S120 | -0.0000040  | -5.9389400 | 0.0005770  |
| H121 | -2.2724800  | -8.9575700 | 2.4504900  |
| H122 | -3.9813000  | -8.9891300 | 2.9223200  |
| H123 | -3.4854400  | -9.6222600 | 1.3509200  |

|      |            |            |            |
|------|------------|------------|------------|
| C124 | 0.6831500  | -8.4172600 | -0.1869400 |
| H125 | -1.2587700 | -9.3253100 | 0.3167400  |
| C126 | 1.2240200  | -7.1542800 | -0.3442600 |
| H127 | 1.2587600  | -9.3253700 | -0.3149200 |
| C128 | 2.5619000  | -6.7630000 | -0.7353200 |
| C129 | 3.4989800  | -7.4572000 | -1.4913800 |
| S130 | 3.1848600  | -5.1859100 | -0.2702900 |
| C131 | 4.6964300  | -6.7139800 | -1.6797300 |
| C132 | 3.2962800  | -8.8270400 | -2.0823700 |
| C133 | 4.6994700  | -5.4617200 | -1.1025800 |
| H134 | 5.5440900  | -7.1016400 | -2.2356800 |
| H135 | 3.9813000  | -8.9897100 | -2.9205500 |
| H136 | 3.4854300  | -9.6225300 | -1.3490300 |
| H137 | 2.2724800  | -8.9580600 | -2.4487400 |
| C138 | 5.7278300  | -4.4446000 | -1.1761400 |
| C139 | 6.7105200  | -4.2994400 | -2.1343800 |
| S140 | 5.8372600  | -3.1504000 | 0.0006570  |
| C141 | 7.5251900  | -3.1558900 | -1.9390300 |
| H142 | 6.8074800  | -4.9683100 | -2.9824200 |
| C143 | 7.1761500  | -2.3977100 | -0.8429800 |
| H144 | 8.3175100  | -2.8611400 | -2.6184700 |

Final geometry:

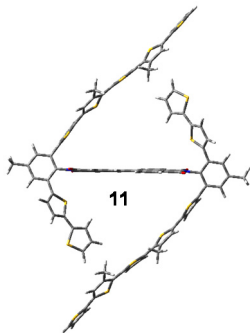

Total energy: -9754.49276862 Hartrees

|     |          |          |          |
|-----|----------|----------|----------|
| C1  | 0.95871  | -2.71421 | -2.56024 |
| C2  | 0.51661  | -1.38751 | -2.56859 |
| C3  | 0.24216  | -0.69402 | -1.3882  |
| C4  | 0.4409   | -1.36277 | -0.1387  |
| C5  | 0.87715  | -2.72411 | -0.13926 |
| C6  | 1.1322   | -3.38817 | -1.36398 |
| C7  | 0.21252  | -0.70384 | 1.11108  |
| C8  | 0.40472  | -1.42547 | 2.29081  |
| C9  | 0.81396  | -2.76296 | 2.28128  |
| C10 | 1.05364  | -3.41505 | 1.08438  |
| C11 | 1.58437  | -4.79821 | -1.39089 |
| C12 | 1.46155  | -4.8392  | 1.10759  |
| C13 | -0.24255 | 0.69396  | -1.3882  |
| C14 | -0.21281 | 0.70382  | 1.11108  |
| C15 | -0.44122 | 1.36274  | -0.13871 |

|     |           |          |          |
|-----|-----------|----------|----------|
| C16 | -0.87741  | 2.7241   | -0.13927 |
| C17 | -1.0538   | 3.41507  | 1.08437  |
| C18 | -0.81411  | 2.76299  | 2.28127  |
| C19 | -0.40493  | 1.42548  | 2.29081  |
| C20 | -0.51706  | 1.38743  | -2.56858 |
| C21 | -0.9591   | 2.71415  | -2.56024 |
| C22 | -1.1325   | 3.38814  | -1.36399 |
| C23 | -1.58457  | 4.79822  | -1.39089 |
| C24 | -1.46159  | 4.83925  | 1.10758  |
| N25 | 1.70772   | -5.44122 | -0.14375 |
| N26 | -1.70777  | 5.44126  | -0.14377 |
| O27 | -1.57246  | 5.48079  | 2.13996  |
| O28 | -1.84329  | 5.39108  | -2.42724 |
| O29 | 1.57249   | -5.48071 | 2.13999  |
| O30 | 1.84306   | -5.39107 | -2.42724 |
| C31 | -2.03734  | 6.84718  | -0.14897 |
| C32 | 2.03742   | -6.8471  | -0.14899 |
| C33 | -1.00602  | 7.7706   | -0.39203 |
| C34 | -1.29934  | 9.13746  | -0.38794 |
| C35 | -2.59432  | 9.60371  | -0.13747 |
| C36 | -3.59832  | 8.66518  | 0.09794  |
| C37 | -3.35116  | 7.28051  | 0.09949  |
| C38 | 1.00619   | -7.77062 | -0.39214 |
| C39 | 1.29968   | -9.13744 | -0.38829 |
| C40 | 2.59475   | -9.60357 | -0.13795 |
| C41 | 3.59862   | -8.66496 | 0.09763  |
| C42 | 3.35128   | -7.28031 | 0.0994   |
| C43 | -9.56894  | -2.65015 | -0.16738 |
| C44 | -9.14967  | -3.03108 | -1.4309  |
| C45 | -7.99508  | -3.84264 | -1.43564 |
| C46 | -7.48542  | -4.10944 | -0.17662 |
| S47 | -8.48308  | -3.32469 | 1.04094  |
| S48 | -5.06813  | -5.05809 | -1.1052  |
| C49 | -6.2809   | -4.83962 | 0.15355  |
| C50 | -5.86642  | -5.43159 | 1.34004  |
| C51 | -4.60028  | -6.06716 | 1.21144  |
| C52 | -4.03002  | -5.98035 | -0.03904 |
| S53 | -1.45717  | -6.82406 | 0.62588  |
| C54 | -2.75963  | -6.49492 | -0.50441 |
| C55 | -2.35039  | -6.75894 | -1.79412 |
| C56 | -1.00953  | -7.22358 | -1.88072 |
| C57 | -0.37949  | -7.31839 | -0.66523 |
| C58 | -12.32501 | -0.51891 | 1.22699  |
| C59 | -11.06539 | -1.17284 | 1.33167  |
| C60 | -10.74404 | -1.88072 | 0.17949  |
| S61 | -12.03979 | -1.75496 | -1.00756 |
| C62 | -5.42538  | 6.55805  | 1.37624  |
| C63 | -6.43032  | 5.55739  | 1.39935  |
| S64 | -4.86363  | 4.95543  | -0.55699 |
| C65 | -4.47902  | 6.3794   | 0.39232  |

|      |           |           |          |
|------|-----------|-----------|----------|
| C66  | 2.89148   | -11.08473 | -0.11626 |
| C67  | -2.89088  | 11.08491  | -0.11536 |
| C68  | -10.20018 | -1.05286  | 2.55991  |
| C69  | -6.64122  | -5.44927  | 2.63239  |
| H70  | 1.16789   | -3.23723  | -3.48728 |
| H71  | 0.39292   | -0.90131  | -3.52885 |
| H72  | 0.23029   | -0.95679  | 3.25192  |
| H73  | 0.94793   | -3.31063  | 3.20801  |
| H74  | -0.948    | 3.31068   | 3.208    |
| H75  | -0.23048  | 0.9568    | 3.25192  |
| H76  | -0.39344  | 0.9012    | -3.52884 |
| H77  | -1.16832  | 3.23715   | -3.48728 |
| H78  | -0.49585  | 9.84259   | -0.58281 |
| H79  | -4.61693  | 9.00367   | 0.26397  |
| H80  | 0.49628   | -9.84265  | -0.58319 |
| H81  | 4.61727   | -9.00334  | 0.26362  |
| H82  | -9.66794  | -2.72943  | -2.33492 |
| H83  | -7.54371  | -4.22903  | -2.34315 |
| H84  | -4.1323   | -6.60533  | 2.02995  |
| H85  | -2.99969  | -6.63404  | -2.65442 |
| H86  | -0.50912  | -7.46306  | -2.81222 |
| H87  | -12.7242  | 0.1038    | 2.02177  |
| H88  | -5.37169  | 7.37131   | 2.09184  |
| H89  | -7.22762  | 5.52323   | 2.13422  |
| H90  | 2.54746   | -11.54272 | 0.82023  |
| H91  | 2.38488   | -11.606   | -0.93604 |
| H92  | 3.96499   | -11.27884 | -0.20335 |
| H93  | -2.54828  | 11.54226  | 0.82197  |
| H94  | -2.3829   | 11.6066   | -0.93401 |
| H95  | -3.96423  | 11.27922  | -0.20399 |
| H96  | -10.58985 | -0.27564  | 3.22445  |
| H97  | -10.16968 | -1.98803  | 3.13314  |
| H98  | -9.16748  | -0.78914  | 2.30662  |
| H99  | -7.69823  | -5.68883  | 2.4736   |
| H100 | -6.22605  | -6.19808  | 3.31406  |
| H101 | -6.60138  | -4.48086  | 3.14771  |
| C102 | 4.47904   | -6.37912  | 0.39237  |
| S103 | 4.8634    | -4.95483  | -0.55655 |
| C104 | 5.4255    | -6.55791  | 1.37619  |
| C105 | 6.4303    | -5.55712  | 1.3995   |
| H106 | 5.37196   | -7.37136  | 2.09158  |
| H107 | 7.22765   | -5.52308  | 2.13432  |
| S108 | 12.03952  | 1.75412   | -1.00799 |
| C109 | 12.32566  | 0.5195    | 1.22724  |
| C110 | 10.74416  | 1.88044   | 0.17943  |
| C111 | 11.06599  | 1.17332   | 1.33193  |
| H112 | 12.72519  | -0.10265  | 2.02228  |
| C113 | 9.56885   | 2.6495    | -0.16754 |
| C114 | 10.20118  | 1.05398   | 2.56052  |
| C115 | 9.1488    | 3.02909   | -1.4312  |



|      |           |          |          |
|------|-----------|----------|----------|
| S116 | 8.48375   | 3.32533  | 1.04074  |
| H117 | 9.16831   | 0.79055  | 2.30769  |
| H118 | 10.59084  | 0.27683  | 3.22515  |
| H119 | 10.17122  | 1.98934  | 3.13348  |
| C120 | 7.99418   | 3.84061  | -1.43609 |
| H121 | 9.6665    | 2.72647  | -2.33522 |
| C122 | 7.48528   | 4.10873  | -0.17703 |
| H123 | 7.54223   | 4.226    | -2.34374 |
| C124 | 6.28096   | 4.83926  | 0.1531   |
| C125 | 5.8669    | 5.4319   | 1.3394   |
| S126 | 5.06784   | 5.05724  | -1.10541 |
| C127 | 4.60081   | 6.06757  | 1.21084  |
| C128 | 6.64206   | 5.45013  | 2.63153  |
| C129 | 4.03016   | 5.98018  | -0.03942 |
| H130 | 4.13313   | 6.6062   | 2.02922  |
| H131 | 6.22671   | 6.19884  | 3.31321  |
| H132 | 6.60284   | 4.48178  | 3.147    |
| H133 | 7.69891   | 5.69019  | 2.47241  |
| C124 | 2.75969   | 6.49463  | -0.50469 |
| C135 | 2.35011   | 6.75795  | -1.79443 |
| S136 | 1.45757   | 6.82449  | 0.62578  |
| C137 | 1.00926   | 7.22264  | -1.88093 |
| H138 | 2.99917   | 6.63254  | -2.65484 |
| C139 | 0.37957   | 7.31819  | -0.66532 |
| H140 | 0.50861   | 7.46162  | -2.81243 |
| C141 | -14.2592  | -0.18225 | -0.4033  |
| C142 | -14.77335 | -0.09534 | -1.68033 |
| S143 | -15.41243 | 0.4595   | 0.75702  |
| C144 | -16.07116 | 0.4863   | -1.73296 |
| H145 | -14.22464 | -0.42141 | -2.55759 |
| C146 | -16.54515 | 0.8429   | -0.50036 |
| H147 | -16.62456 | 0.6399   | -2.65295 |
| H148 | -17.49017 | 1.30623  | -0.25098 |
| C149 | -7.09219  | 3.43258  | 0.14921  |
| C150 | -6.74985  | 2.25473  | -0.47981 |
| S151 | -8.77987  | 3.38925  | 0.63507  |
| C152 | -7.8214   | 1.31988  | -0.56121 |
| H153 | -5.74932  | 2.05814  | -0.85046 |
| C154 | -8.97783  | 1.78498  | 0.00314  |
| H155 | -7.73402  | 0.33675  | -1.01094 |
| H156 | -9.93316  | 1.28411  | 0.0865   |
| C157 | 7.09187   | -3.43193 | 0.14986  |
| C158 | 6.74945   | -2.25402 | -0.479   |
| S159 | 8.77952   | -3.38849 | 0.63583  |
| C160 | 7.82091   | -1.31904 | -0.5602  |
| H161 | 5.74892   | -2.05748 | -0.8497  |
| C162 | 8.97735   | -1.78411 | 0.00416  |
| H163 | 7.73347   | -0.33586 | -1.00981 |
| H164 | 9.93261   | -1.28315 | 0.08767  |
| C165 | 6.27316   | -4.59751 | 0.42265  |

|      |           |          |          |
|------|-----------|----------|----------|
| C166 | -6.27337  | 4.59802  | 0.42223  |
| C167 | -12.98258 | -0.70718 | 0.03077  |
| C168 | 14.25936  | 0.18208  | -0.40348 |
| C169 | 14.77352  | 0.09539  | -1.68053 |
| S170 | 15.41245  | -0.46018 | 0.7567   |
| C171 | 16.07123  | -0.48646 | -1.73328 |
| H172 | 14.22492  | 0.42181  | -2.55772 |
| C173 | 16.54514  | -0.84345 | -0.50076 |
| H174 | 16.62463  | -0.6399  | -2.6533  |
| H175 | 17.49007  | -1.307   | -0.25146 |
| C176 | 12.98282  | 0.70714  | 0.03068  |

Final geometry:

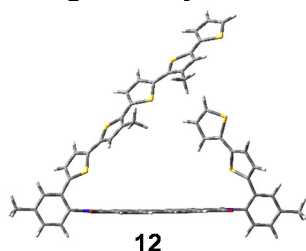

Total energy: -5813.16854119 Hartrees

|     |          |         |          |
|-----|----------|---------|----------|
| C1  | 0.21155  | 5.03336 | 2.21321  |
| C2  | 1.42403  | 4.3359  | 2.22778  |
| C3  | 2.0176   | 3.86163 | 1.05631  |
| C4  | 1.35849  | 4.10387 | -0.1908  |
| C5  | 0.11958  | 4.81776 | -0.19664 |
| C6  | -0.44424 | 5.27602 | 1.01895  |
| C7  | 1.90607  | 3.6475  | -1.43197 |
| C8  | 1.20926  | 3.9224  | -2.61034 |
| C9  | -0.00184 | 4.62223 | -2.60752 |
| C10 | -0.55118 | 5.06888 | -1.41836 |
| C11 | -1.72666 | 6.0215  | 1.03876  |
| C12 | -1.841   | 5.79954 | -1.44974 |
| C13 | 3.28697  | 3.11894 | 1.06327  |
| C14 | 3.17326  | 2.90128 | -1.42458 |
| C15 | 3.82789  | 2.65121 | -0.1766  |
| C16 | 5.0511   | 1.91085 | -0.1679  |
| C17 | 5.60316  | 1.43389 | -1.38161 |
| C18 | 4.95879  | 1.69592 | -2.57805 |
| C19 | 3.7619   | 2.41939 | -2.59539 |
| C20 | 3.98478  | 2.84527 | 2.2414   |
| C21 | 5.18015  | 2.11902 | 2.24136  |
| C22 | 5.71477  | 1.64724 | 1.05511  |
| C23 | 6.96356  | 0.84936 | 1.09407  |
| C24 | 6.85936  | 0.64647 | -1.39696 |
| N25 | -2.35424 | 6.22396 | -0.20857 |
| N26 | 7.44781  | 0.37892 | -0.14211 |
| O27 | 7.36814  | 0.23635 | -2.42707 |
| O28 | 7.54641  | 0.58686 | 2.13497  |

|     |          |          |          |
|-----|----------|----------|----------|
| O29 | -2.44515 | 6.02502  | -2.48681 |
| O30 | -2.22478 | 6.44743  | 2.06756  |
| C31 | 8.6396   | -0.43938 | -0.13325 |
| C32 | -3.59053 | 6.97454  | -0.21385 |
| C33 | 9.88077  | 0.18714  | -0.05074 |
| C34 | 11.05342 | -0.55958 | -0.09127 |
| C35 | 11.00642 | -1.95356 | -0.22507 |
| C36 | 9.75415  | -2.56705 | -0.29641 |
| C37 | 8.5529   | -1.83822 | -0.25025 |
| C38 | -4.8202  | 6.36513  | 0.09139  |
| C39 | -5.96416 | 7.18511  | 0.11192  |
| C40 | -5.91534 | 8.55409  | -0.15391 |
| C41 | -4.6737  | 9.12323  | -0.46657 |
| C42 | -3.52652 | 8.33858  | -0.49216 |
| C43 | -0.08954 | -5.10065 | 0.33072  |
| C44 | -0.40973 | -6.06761 | -0.60532 |
| C45 | -1.79094 | -6.34613 | -0.69512 |
| C46 | -2.57609 | -5.59999 | 0.16703  |
| S47 | -1.55614 | -4.51321 | 1.10046  |
| S48 | -4.95993 | -6.31628 | -1.01777 |
| C49 | -4.01626 | -5.62925 | 0.30212  |
| C50 | -4.85019 | -5.19765 | 1.32704  |
| C51 | -6.22224 | -5.45155 | 1.04622  |
| S52 | -4.31141 | 3.6417   | -0.55495 |
| C53 | -5.76734 | 2.99678  | 1.47194  |
| C54 | -5.74329 | 4.41494  | 1.4386   |
| C55 | -4.98482 | 4.93834  | 0.41593  |
| C56 | 3.07108  | -3.57779 | 1.65875  |
| C57 | 1.71112  | -3.97014 | 1.79506  |
| C58 | 1.21604  | -4.55588 | 0.63765  |
| S59 | 2.44593  | -4.58372 | -0.62241 |
| C60 | 3.6336   | -3.8418  | 0.42892  |
| C61 | 6.94679  | -3.52268 | -1.2948  |
| C62 | 5.65099  | -4.07457 | -1.1208  |
| C63 | 4.97143  | -3.55382 | -0.03913 |
| S64 | 5.9607   | -2.35792 | 0.77846  |
| C65 | 7.27767  | -2.56862 | -0.36002 |
| C66 | -7.16559 | 9.40098  | -0.10837 |
| C67 | 12.27721 | -2.76794 | -0.29075 |
| C68 | 0.94795  | -3.77677 | 3.08035  |
| C69 | -4.40575 | -4.5542  | 2.61568  |
| H70 | -0.23502 | 5.39283  | 3.13415  |
| H71 | 1.89801  | 4.16683  | 3.18726  |
| H72 | 1.59838  | 3.58987  | -3.5652  |
| H73 | -0.53109 | 4.82287  | -3.53296 |
| H74 | 5.39752  | 1.32374  | -3.49768 |
| H75 | 3.29151  | 2.5948   | -3.55544 |
| H76 | 3.60335  | 3.19085  | 3.19476  |
| H77 | 5.7026   | 1.90716  | 3.16819  |
| H78 | 12.0136  | -0.05443 | -0.02079 |

|      |           |          |          |
|------|-----------|----------|----------|
| H79  | 9.69342   | -3.64926 | -0.37128 |
| H80  | -6.92213  | 6.71874  | 0.32363  |
| H81  | -4.60403  | 10.18466 | -0.69135 |
| H82  | 0.3429    | -6.58438 | -1.19108 |
| H83  | -2.20337  | -7.10041 | -1.35668 |
| H84  | -7.0128   | -5.21296 | 1.75115  |
| H85  | -6.28506  | 2.42199  | 2.2326   |
| H86  | -6.24043  | 5.04186  | 2.17084  |
| H87  | 3.63232   | -3.12977 | 2.47304  |
| H88  | 7.61429   | -3.79672 | -2.1045  |
| H89  | 5.23052   | -4.83559 | -1.76987 |
| H90  | -8.06577  | 8.783    | -0.03602 |
| H91  | -7.15561  | 10.07583 | 0.75726  |
| H92  | -7.25694  | 10.02679 | -1.00375 |
| H93  | 12.80193  | -2.60718 | -1.24134 |
| H94  | 12.97116  | -2.49086 | 0.51127  |
| H95  | 12.07162  | -3.83918 | -0.20335 |
| H96  | 1.64092   | -3.63127 | 3.91512  |
| H97  | 0.29539   | -2.89495 | 3.04075  |
| H98  | 0.31486   | -4.63877 | 3.31385  |
| H99  | -4.09834  | -3.51132 | 2.46583  |
| H100 | -5.22573  | -4.55195 | 3.34057  |
| H101 | -3.55968  | -5.08281 | 3.06759  |
| H102 | -2.56255  | 8.78133  | -0.72349 |
| H103 | 9.91891   | 1.26833  | 0.03849  |
| C104 | -7.72916  | -6.46649 | -0.74549 |
| C105 | -7.96477  | -7.33151 | -1.79389 |
| S106 | -9.24963  | -5.83759 | -0.12837 |
| C107 | -9.3456   | -7.49723 | -2.09577 |
| H108 | -7.16852  | -7.84793 | -2.31954 |
| C109 | -10.16093 | -6.76199 | -1.27984 |
| H110 | -9.71559  | -8.1437  | -2.88408 |
| H111 | -11.24095 | -6.70331 | -1.28355 |
| C112 | -4.82908  | 1.00199  | 0.18352  |
| C113 | -3.79324  | 0.388    | -0.48724 |
| S114 | -6.0057   | -0.19485 | 0.70245  |
| C115 | -3.93059  | -1.02678 | -0.57539 |
| H116 | -2.94695  | 0.93729  | -0.88609 |
| C117 | -5.06873  | -1.49043 | 0.02613  |
| H118 | -3.20742  | -1.67441 | -1.05885 |
| H119 | -5.41881  | -2.51124 | 0.10583  |
| C120 | -6.46746  | -6.06139 | -0.16475 |
| C121 | -5.03165  | 2.41035  | 0.46483  |

Final geometry:

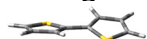

**13**

Total energy: -1104.81669881 Hartrees

|     |          |          |          |
|-----|----------|----------|----------|
| C1  | 0        | 3.21057  | -0.05036 |
| C2  | -1.26892 | 2.7657   | 0.19851  |
| C3  | -1.35485 | 1.34567  | 0.26702  |
| S4  | 1.11645  | 1.89317  | -0.22313 |
| H5  | 0.3497   | 4.22987  | -0.14378 |
| H6  | -2.11707 | 3.42706  | 0.33872  |
| H7  | -2.27318 | 0.80799  | 0.4783   |
| C8  | 0.14867  | -0.71017 | 0.06763  |
| C9  | 1.35485  | -1.34567 | 0.26702  |
| S10 | -1.11645 | -1.89317 | -0.22313 |
| C11 | 1.26892  | -2.7657  | 0.19851  |
| H12 | 2.27318  | -0.80799 | 0.4783   |
| C13 | 0        | -3.21057 | -0.05036 |
| H14 | 2.11707  | -3.42706 | 0.33872  |
| H15 | -0.3497  | -4.22987 | -0.14378 |
| C16 | -0.14867 | 0.71017  | 0.06763  |

## Supporting References

---

- [S1] W. Kabsch, *Acta Crystallogr. D* **2010**, *66*, 125-132.
- [S2] Bruker, **2014**, XPREP Version 2014/2, Bruker AXS Inc., Madison.
- [S3] G. M. Sheldrick, *Acta Crystallogr. A* **2008**, *64*, 112-122.
- [S4] N. Auerhammer, A. Schulz, A. Schmiedel, M. Holzapfel, J. Hoche, M. I. S. Röhr, R. Mitric, C. Lambert, *Phys. Chem. Chem. Phys.* **2019**, *21*, 9013-9025.
- [S5] Gaussian 16, Revision B.01, M. J. Frisch, G. W. Trucks, H. B. Schlegel, G. E. Scuseria, M. A. Robb, J. R. Cheeseman, G. Scalmani, V. Barone, G. A. Petersson, H. Nakatsuji, X. Li, M. Caricato, A. V. Marenich, J. Bloino, B. G. Janesko, R. Gomperts, B. Mennucci, H. P. Hratchian, J. V. Ortiz, A. F. Izmaylov, J. L. Sonnenberg, D. Williams-Young, F. Ding, F. Lipparini, F. Egidi, J. Goings, B. Peng, A. Petrone, T. Henderson, D. Ranasinghe, V. G. Zakrzewski, J. Gao, N. Rega, G. Zheng, W. Liang, M. Hada, M. Ehara, K. Toyota, R. Fukuda, J. Hasegawa, M. Ishida, T. Nakajima, Y. Honda, O. Kitao, H. Nakai, T. Vreven, K. Throssell, J. A. Montgomery, Jr., J. E. Peralta, F. Ogliaro, M. J. Bearpark, J. J. Heyd, E. N. Brothers, K. N. Kudin, V. N. Staroverov, T. A. Keith, R. Kobayashi, J. Normand, K. Raghavachari, A. P. Rendell, J. C. Burant, S. S. Iyengar, J. Tomasi, M. Cossi, J. M. Millam, M. Klene, C. Adamo, R. Cammi, J. W. Ochterski, R. L. Martin, K. Morokuma, O. Farkas, J. B. Foresman, and D. J. Fox, Gaussian, Inc., Wallingford CT, 2016.
- [S6] M.-A. Sato, K. Fukui, *Synth. Met.* **2007**, *157*, 619-626.
- [S7] W. E. Benjamin, D. R. Veit, M. J. Perkins, E. Bain, K. Scharnhorst, S. McDowall, D. L. Patrick, J. D. Gilbertson, *Chem. Mater.* **2014**, *26*, 1291-1293.
- [S8] K. Bold, M. Stolte, F. Würthner, *Organic Materials* **2021**, *03*, 119-127.
- [S9] For a similar half-life time determination of two rotamers see: F. Yang, C. Liu, D. Yin, Y. Xu, M. Wu, W. Wei, *Chem. Commun.* **2019**, *55*, 14335-14338.
- [S10] For a similar determination of strain energies see: M. Ball, B. Fowler, P. Li, L. A. Joyce, F. Li, T. Liu, D. Paley, Y. Zhong, H. Li, S. Xiao, F. Ng, M. L. Steigerwald, C. Nuckolls, *J. Am. Chem. Soc.* **2015**, *137*, 9982-9987.
- [S11] A. M. Brouwer, *Pure Appl. Chem.* **2011**, *83*, 2213-2228.
